1 **SHORT TITLE: Test-retest reliability in fMRI of depression**

2

3 **Importance of test-retest reliability for promoting fMRI based screening and**  
4 **interventions in major depressive disorder**

5 Laurie Compère, PhD <sup>1</sup>, Greg J. Siegle, PhD <sup>1</sup>, Kimberly Young, PhD <sup>1</sup>

6 <sup>1</sup> Department of Psychiatry, University of Pittsburgh School of Medicine

7 Western Psychiatric Institute and Clinic

8 3811 O'Hara Street

9 Pittsburgh, PA 15213

10 [ljc44@pitt.edu](mailto:ljc44@pitt.edu)

11 [gsiegle@pitt.edu](mailto:gsiegle@pitt.edu)

12 [youngk@pitt.edu](mailto:youngk@pitt.edu)

13

14

15 **Corresponding author**

16 Laurie Compère, Department of Psychiatry, University of Pittsburgh School of  
17 Medicine

18 Western Psychiatric Institute and Clinic

19 3811 O'Hara Street

20 Pittsburgh, PA 15213

21 Email: [ljc44@pitt.edu](mailto:ljc44@pitt.edu)

22

23 **Abstract**

24 Proponents of personalized medicine have promoted neuroimaging evaluation and  
25 treatment of major depressive disorder in three areas of clinical application: clinical  
26 prediction, outcome evaluation, and neurofeedback. Whereas psychometric  
27 considerations such as test-retest reliability are basic precursors to clinical adoption  
28 for most clinical instruments, they are often not considered for neuroimaging  
29 assessments. As an example, we consider functional magnetic resonance imaging  
30 (fMRI) of depression, a common and particularly well validated mechanistic technology  
31 for understanding disorder and guiding treatment. In this article, we review work on  
32 test-retest reliability for depression fMRI studies. We find that basic psychometrics  
33 have not been regularly attended to in this domain. For instance, no fMRI  
34 neurofeedback study has included measures of test-retest reliability despite the implicit

35 assumption that brain signals are stable enough to train. We consider several factors  
36 that could be useful to aid clinical translation including 1) attending to how the BOLD  
37 response is parameterized, 2) identifying and promoting regions or voxels with stronger  
38 psychometric properties 3) accounting for within-individual changes (e.g., in  
39 symptomatology) across time and 4) focusing on tasks and clinical populations that  
40 are relevant for the intended clinical application. We apply these principles to published  
41 prognostic and neurofeedback data sets. The broad implication of this work is that  
42 attention to psychometrics is important for clinical adoption of mechanistic assessment,  
43 is feasible, and may improve the underlying science.

44

45 **Keywords:** depression, fMRI, neurofeedback, psychometric, treatment prediction,  
46 test-retest reliability

47

48

49

50

## 1. GENERAL INTRODUCTION

51 Proponents of personalized medicine have promoted mechanistic evaluation and  
52 mechanistically targeted treatments for major depressive disorder (Hansen and Siegle,  
53 2015). As an example, we consider functional magnetic resonance imaging (fMRI), a  
54 common and particularly well validated mechanistic technology that represents a  
55 promising proof-of-concept in this area. Longitudinal assessment of changes in  
56 regional brain activity using functional magnetic resonance imaging (fMRI) has  
57 increasingly been used in research on the treatment of psychiatric conditions including  
58 major depressive disorder (MDD) (Fournier et al., 2014). As good psychometric  
59 properties are essential for any measure to be considered for clinical adoption  
60 (Pickford and Guilford, 2007), best-practice guidelines for increasing generalizability  
61 and reproducibility of fMRI results are emerging (Nichols et al., 2017; Poldrack et al.,  
62 2017). We focus here on test-retest reliability in task-based fMRI and neurofeedback  
63 (fMRI-nf) designs, using MDD as a running case example. Ideally, our observations  
64 can be applied to other technologies and across neuropsychiatric disorders.

65 To understand the current state of the field, we conducted literature reviews  
66 quantifying how often test-retest reliability was reported in fMRI biomarker and real-  
67 time fMRI neurofeedback (rtfMRI-nf) studies in MDD. As we will demonstrate below,  
68 this was infrequent and the general literature has shown that when assessed, reliability  
69 was generally low. We thus suggest a few analytic techniques for improving test-rest  
70 reliability in fMRI and its clinical applicability. We focus on data analysis to make our  
71 suggestions maximally applicable to already collected data. Finally, we test these  
72 suggested principles on published MDD neuroimaging treatment outcome and  
73 neurofeedback datasets as proofs of concept.

74 The idea that fMRI could have therapeutic utility is based on assumptions that  
75 hemodynamic activity is reliable over time in the absence of intervention, and that  
76 observed changes between one scan session and the next have significant and  
77 interpretable values (Barch and Mathalon, 2011). The reliability of fMRI also affects its  
78 criterion validity, as poor reliability limits the strength of association between the  
79 instrument and other relevant measures (Vul et al., 2009).

80

### 81 1.1. On computing reliability of fMRI

82 Demonstrating ability to achieve similar results over time, or the reliability of  
83 measures is considered critical to creating a clinically useful measure (Pickford and

84 Guilford, 2007). Reliability is a quantitative measure of stability of an individual's data  
85 (Bennett and Miller, 2013). It refers to the ability of a measure to distinguish participants  
86 from each other and to replicate the order of individuals' ranks during repeated  
87 assessments, assuming they do not experience true signal change between  
88 assessments (Barch and Mathalon, 2011).

89 Though stable regional hemodynamic activations at the group level can be  
90 observed over time, there are significant changes in how each subject contributes  
91 individually to the observed group activation (Caceres et al., 2009; Zandbelt et al.,  
92 2008). Various approaches have been used to measure test-retest reliability for fMRI.  
93 For example, a Pearson correlation between visits across time measure the degree  
94 to which visits on two occasions are linearly related, where data from each visit are  
95 independently scaled (e.g., Harrington et al., 2006). A more common approach, and  
96 the measure we focus on in this manuscript, involves computing intra-class correlation  
97 coefficients (ICC) that also reflect rank ordering of values across days (Bennett and  
98 Miller, 2010) as a ratio of variance between values observed across subjects and sites  
99 divided by the total visit variance (Bartko, 1966). Values range from 0 (no reliability) to  
100 1 (perfect reliability). There are three different types of ICCs described by the princeps  
101 article written by Shrout and Fleiss (1979). The ICC(1,1) index is similar to the Pearson  
102 correlation but normalizes by the pooled mean and variance across visits. ICC(2,1) is  
103 an agreement index that allows generalization of results across scanners while  
104 ICC(3,1) works under the assumption that the variance is the same across scanners.  
105 Therefore, the ICC(3,1), mostly used across studies, is a scanner consistency index  
106 where the effect of scanner is considered a fixed effect (Shrout and Fleiss, 1979). In  
107 order to match the literature in the field and because we considered the scanner as a  
108 covariate of interest when investigating the impact of taking into account clinical and  
109 design covariates when computing reliability indexes, we mainly used ICC(3,1) in our  
110 analyses.

111 Interpretation of ICC values is subjective with no uniformly accepted standards; ICC  
112 values of less than 0.4 are often considered poor, 0.4-0.59 fair, 0.60-0.74 good, and  
113 above 0.75 excellent (Cicchetti, 1994; Plichta et al., 2012; Shrout and Fleiss, 1979),  
114 though more stringent cutoffs have also been recommended (e.g., Portney and  
115 Watkins, 2009). Negative ICC value are usually interpreted as no reliability (Bartko,  
116 1976), since these values are outside the theoretical limits of ICC (although negative

117 values may appear when within-subject variance is greater than between-subject  
118 variance) (Lahey et al., 1983).

119 Though the ICC has been recommended for use in fMRI (Caceres et al., 2009),  
120 some fMRI analysis packages (SPM, FSL) do not inherently support computation of  
121 this metric, potentially hinting at its perceived value in the field, though other packages  
122 (e.g., AFNI, NIFTI) do provide for its computation, and add-on packages (e.g., reliability  
123 toolbox for SPM or other packages on R) do allow such computations (see  
124 Computation of voxelwise ICCs using different tools in Box 3 in supplementary  
125 materials for more details). Indeed, reliability estimates have been rarely reported in  
126 fMRI studies and usually reveal poor reliability when estimated (Elliott et al., 2020).  
127 Non-clinical studies have generally found low to moderate test-retest reliability values  
128 for regional fMRI activity, with ICCs ranging from 0.33-0.66 (reviewed in Bennett and  
129 Miller, 2010).

130

## 131 **1.2. Biomarker/Prediction Studies Review**

132 Many studies suggest fMRI measurements can be used to predict treatment  
133 outcome in MDD (for reviews, see Arnone, 2019; Fonseka et al., 2018; Phillips and  
134 Swartz, 2014; Wessa and Lois, 2015). The underlying assumption is that biomarkers  
135 in the brain are involved in the causal process of MDD. Therefore, it is expected that  
136 the activity measured in these biomarkers is related to, and evolves over time with,  
137 symptom changes in general and that for interventions targeting the biomarker the  
138 more abnormal activity observed, the more effective the intervention will be. However,  
139 clinical applications of these findings are limited by the possibility that these biomarkers  
140 may have low test-retest reliability (Nord et al., 2017). If a biomarker is not reliable, it  
141 is impractical to interpret its activation at the individual level (Fu et al., 2013; Guo et  
142 al., 2012). Thus, despite strong predictive utility, researchers acknowledge that their  
143 results might be limited by poor test-retest reliability (e.g., Fu et al., 2015). Of particular  
144 interest, the amygdala, a commonly reported biomarker for MDD, shows poor to good  
145 reliability when emotional stimuli are displayed, with great heterogeneity between  
146 studies in healthy participants (Lois et al., 2018). Thus, we surveyed the predictive  
147 fMRI literature in MDD to examine whether this first step was being taken.

### 148 **1.2.1. Method**

149 A PubMed search with the key words “fMRI AND biomarker OR prediction OR  
150 predict AND depression OR MDD OR major depressive disorder NOT Rest NOT

151 Resting” produced 140,640 results. We combined this list with other articles  
 152 discovered in our submitted fMRI meta-analysis of depression treatment outcome  
 153 prediction studies (Strege et al., 2020) to complete the list of articles (Table 1).” After  
 154 removing articles not including functional neuroimaging (i.e., studies focusing on  
 155 volumetric measures or using PET) or human participants, we were left with 55 studies  
 156 (Table 1).

157 **Table 1: Studies Examining neuroimaging biomarkers of pharmacotherapy and**  
 158 **psychotherapy outcomes in Major Depressive Disorder and mention of test-**  
 159 **retest reliability of the studies**

160

| Reference               | Treatment(s) | Biomarker                         | Findings                                                                 | Mention of signal reliability | Possibility to test signal reliability |
|-------------------------|--------------|-----------------------------------|--------------------------------------------------------------------------|-------------------------------|----------------------------------------|
| Sheline et al.(2001)    | Sertraline   | Amygdala                          | Decreased activation following treatment                                 | No                            | Yes                                    |
| Davidson, et al. (2003) | Venlafaxine  | ACC                               | Greater activation at baseline associated with better treatment response | No                            | Yes                                    |
| Fu et al. (2004)        | Fluoxetine   | ACC, ventral striatum, cerebellum | Reduction of dynamic range associated with symptoms improvement          | No                            | Yes                                    |
| Canli et al. (2005)     | None         | Amygdala                          | Amygdala activation at baseline predicts symptom improvement             | No                            | No                                     |

|                                |              |                                                                                   |                                                                                                     |    |     |
|--------------------------------|--------------|-----------------------------------------------------------------------------------|-----------------------------------------------------------------------------------------------------|----|-----|
| Schaefer, et al. (2006)        | Venlafaxine  | Prefrontal, temporal and parietal cortices, insula, basal ganglia and hippocampus | Normalized activation after treatment                                                               | No | Yes |
| Siegle, Carter, & Thase (2006) | CBT          | sgACC and amygdala                                                                | Low and high, respectively, activation is associated with greater symptom improvement after therapy | No | No  |
| Anand, et al. (2007)           | Sertaline    | Amygdala and ACC                                                                  | Decrease activation in limbic regions and increased connectivity with the ACC after treatment       | No | Yes |
| Chen et al. (2007)             | Fluoxetine   | ACC                                                                               | Greater activation at baseline predict faster rates of symptom improvement                          | No | No  |
| Fales et al. (2007)            | Escitalopram | DLPFC                                                                             | Enhanced activation following treatment                                                             | No | Yes |
| Fitzgerald et al. (2007)       | TMS          | Middle frontal gyrus, left precuneus, left precentral gyrus, left medial frontal  | Decreased activation after low frequency treatment in middle frontal gyrus and left                 | No | Yes |

|                           |              |                                                                                                 |                                                                                                                                                                                 |                                       |     |
|---------------------------|--------------|-------------------------------------------------------------------------------------------------|---------------------------------------------------------------------------------------------------------------------------------------------------------------------------------|---------------------------------------|-----|
|                           |              | gyrus, right inferior frontal gyrus                                                             | precuneus in respondents – Increased activation after high frequency treatment in left prefrontal gyrus, left medial frontal gyrus, right inferior frontal gyrus in respondents |                                       |     |
| Fu et al. (2007)          | Fluoxetine   | Hippocampus and extrastriate cortex                                                             | Greater activation following treatment and associated with symptom improvement                                                                                                  | No                                    | Yes |
| Langenecker et al. (2007) | S-citalopram | Insula, right middle frontal gyrus, left inferior frontal gyrus, amygdala and cerebellar vermis | Greater activation at baseline associated with symptoms improvement                                                                                                             | No                                    | Yes |
| Robertson et al. (2007)   | Bupropion    | Amygdala                                                                                        | Reduced activation associated with symptom improvement                                                                                                                          | No                                    | Yes |
| Walsh et al. (2007)       | Fluoxetine   | dACC, left middle frontal and lateral temporal cortices                                         | Reduced activity at baseline associated with                                                                                                                                    | Yes (discussion section) <sup>a</sup> | Yes |



|                           |                           |                                                                                                                   |                                                                                    |    |     |
|---------------------------|---------------------------|-------------------------------------------------------------------------------------------------------------------|------------------------------------------------------------------------------------|----|-----|
|                           |                           |                                                                                                                   | symptom improvement                                                                |    |     |
| Fu et al. (2008)          | CBT                       | dACC                                                                                                              | Reduced activation at baseline associated with symptom improvement                 | No | Yes |
| Benedetti et al. (2009)   | Venlafaxine               | Right medial frontal gyrus                                                                                        | Decreased activation following treatment was associated with symptom improvement   | No | Yes |
| Costafreda, et al. (2009) | CBT                       | ACC, superior and middle frontal cortices, paracentral cortex, superior parietal cortex, precuneus and cerebellum | Activation contributed to prediction of remission                                  | No | No  |
| Dichter et al. (2010)     | Behavioral Action Therapy | Paracingulate gyrus                                                                                               | Activation was prognostic for depressive symptom change after psychotherapy        | No | Yes |
| Forbes et al., 2010       | CBT and SSRI              | Striatum and mPFC                                                                                                 | Final levels of severity symptoms were related to pretreatment striatal reactivity | No | No  |

|                          |                          |                                        |                                                                                           |    |     |
|--------------------------|--------------------------|----------------------------------------|-------------------------------------------------------------------------------------------|----|-----|
|                          |                          |                                        | and greater striatal and lower mPFC activity was prognostic for anxiety symptom reduction |    |     |
| Keedwell et al. (2010)   | Various antidepressants  | Right visual cortex and right sgACC    | Greater baseline activity associated with clinical improvement after treatment            | No | Yes |
| Lemogne et al. (2010)    | Various antidepressants  | Left DLPFC                             | Reduced activation following treatment                                                    | No | Yes |
| López-Solà et al. (2010) | Duoxetine                | pACC, right prefrontal cortex, pons    | Clinical improvement associated with reduced activation                                   | No | Yes |
| Roy et al. (2010)        | Citalopram               | Ventromedial prefrontal cortex and ACC | Greater activation at baseline associated with symptom improvement                        | No | Yes |
| Victor, et al. (2010)    | Sertaline                | Amygdala                               | Decreased activation after treatment                                                      | No | Yes |
| Wagner et al. (2010)     | Citalopram, reboxetine   | Amygdala, hippocampus                  | Decreased activation after citalopram treatment                                           | No | Yes |
| Frodl et al. (2011)      | Mirtazapine, venlafaxine | Left fusiform gyrus, right             | Increased activation in the                                                               | No | Yes |

|                        |                          |                                                                                       |                                                                                                                                                                                           |    |     |
|------------------------|--------------------------|---------------------------------------------------------------------------------------|-------------------------------------------------------------------------------------------------------------------------------------------------------------------------------------------|----|-----|
|                        |                          | rolandic operculum                                                                    | left fusiform gyrus at baseline was associated with a better response to venlafaxine and smaller activation in the right rolandic operculum was related to better response to mirtazapine |    |     |
| Light et al. (2011)    | Venlafaxine, fluoxetine  | Ventrolateral prefrontal cortex                                                       | Reduced activity at baseline is associated with anhedonia reduction                                                                                                                       | No | Yes |
| Ritchey, et al. (2011) | CBT                      | Ventromedial prefrontal cortex                                                        | Increased activity at baseline associated with symptom improvement                                                                                                                        | No | Yes |
| Samson et al. (2011)   | Mirtazapine, venlafaxine | dmPFC, posterior cingulate cortex, superior frontal gyrus, caudate nucleus and insula | Greater activation at treatment associated with better treatment response                                                                                                                 | No | Yes |
| Arnone et al. (2012)   | Citalopram               | Amygdala                                                                              | Reduced activation                                                                                                                                                                        | No | Yes |

|                          |              |                                           |                                                                                                         |                                       |     |
|--------------------------|--------------|-------------------------------------------|---------------------------------------------------------------------------------------------------------|---------------------------------------|-----|
|                          |              |                                           | following treatment                                                                                     |                                       |     |
| Godlewska, et al. (2012) | Escitalopram | Amygdala                                  | Reduced activity after treatment                                                                        | No                                    | No  |
| Rosenblau et al. (2012)  | Escitalopram | Amygdala, prefrontal cortex               | Decreased activation following treatment                                                                | No                                    | Yes |
| Ruhé, et al. (2012)      | Paroxetine   | Amygdala                                  | Lower activation associated with better response to treatment after                                     | No                                    | Yes |
| Siegle et al. (2012)     | CBT          | sgACC                                     | Reduced activation at baseline associated with greater symptom improvement                              | Yes                                   | Yes |
| Stoy et al. (2012)       | Escitalopram | Ventral striatum                          | Increased activation following treatment                                                                | No                                    | Yes |
| Tao et al. (2012)        | Fluoxetine   | Amygdala, orbitofrontal cortex and sgACC  | Decreased activation after treatment                                                                    | Yes (discussion section) <sup>b</sup> | Yes |
| Wang et al. (2012)       | Fluoxetine   | Insula, left ACC and middle frontal gyrus | Decreased activation in insula and left ACC and greater in the middle frontal gyrus following treatment | No                                    | Yes |

|                       |                           |                                                                  |                                                                                                |                                                    |     |
|-----------------------|---------------------------|------------------------------------------------------------------|------------------------------------------------------------------------------------------------|----------------------------------------------------|-----|
| Furey et al. (2013)   | Scopolamine               | Middle occipital cortex                                          | Increased activation at baseline was prognostic for symptoms improvement                       | No                                                 | Yes |
| Heller et al. (2013)  | Fluoxetine or venlafaxine | Nucleus accumbens                                                | Greater activation following treatment associated with more self-reported positive affect      | No                                                 | Yes |
| Miller et al. (2013)  | Escitalopram              | Midbrain, DLPFC, paracingulate, ACC, thalamus and caudate nuclei | Reduced activation at baseline correlated with greater improvement following treatment         | No                                                 | No  |
| Rizvi et al. (2013)   | Fluoxetine and olanzapine | Premotor cortex                                                  | Increased activation at baseline in respondents was prognostic for symptom improvement         | Yes but not reported (method section) <sup>c</sup> | Yes |
| Victor, et al. (2013) | Sertraline                | pgACC                                                            | Increased correlation at baseline correlated with greater clinical improvement after treatment | No                                                 | Yes |
| Toki et al. (2014)    | Various antidepressants   | Left hippocampus                                                 | Increased activation                                                                           | No                                                 | No  |

|                         |                                       |                                                         |                                                                                      |                                       |     |
|-------------------------|---------------------------------------|---------------------------------------------------------|--------------------------------------------------------------------------------------|---------------------------------------|-----|
|                         |                                       |                                                         | associated with greater response treatment                                           |                                       |     |
| Yoshimura et al. (2014) | CBT                                   | vACC                                                    | Improvements in depressive symptoms were negatively correlated with its activity     | No                                    | Yes |
| Fu et al. (2015)        | Duloxetine                            | Posterior cingulate cortex                              | Increased activation following treatment                                             | Yes (limitation section) <sup>d</sup> | Yes |
| Furey et al. (2015)     | Scopolamine                           | sgACC and middle occipital cortex                       | Increased and decreased activation, respectively, associated with treatment response | No                                    | Yes |
| Straub et al., 2015     | CBT                                   | sgACC                                                   | Activation before treatment related to therapeutic success                           | No                                    | Yes |
| Williams et al. (2015)  | Escitalopram, sertraline, venlafaxine | Amygdala                                                | Decreased activation at baseline was associated with treatment response              | No                                    | Yes |
| Cullen et al. (2016)    | Various antidepressants               | Rostral and sgACC, insula, middle frontal cortex, right | Decreased activation in postral and sgACC and increased in ,                         | No                                    | Yes |

|                          |                                          |                                    |                                                                                                                                                        |    |     |
|--------------------------|------------------------------------------|------------------------------------|--------------------------------------------------------------------------------------------------------------------------------------------------------|----|-----|
|                          |                                          | hippocampus and left cerebellum    | insula, middle frontal cortex, right hippocampus and left cerebellum associated with symptom improvement                                               |    |     |
| Delaveau et al. (2016)   | Agomelatine                              | DLPFC and precuneus                | Activation at baseline was related to treatment response                                                                                               | No | Yes |
| Doerig et al. (2016)     | CBT                                      | Amygdala                           | Activity in this region pre-intervention is negatively correlated with the outcome                                                                     | No | No  |
| Godlewska, et al. (2016) | Escitalopram                             | ACC, insula, amygdala and thalamus | Reduced activity after treatment associated with treatment response                                                                                    | No | Yes |
| Gyurak et al. (2016)     | Escitalopram, sertraline and venlafaxine | DLPFC and inferior parietal cortex | Increased DLPFC activation at baseline associated with remission and increased inferior parietal activation associated with remission for SSRI and the | No | Yes |

|                          |                                        |                                |                                                                                            |                                       |     |
|--------------------------|----------------------------------------|--------------------------------|--------------------------------------------------------------------------------------------|---------------------------------------|-----|
|                          |                                        |                                | opposite pattern<br>for SNRI                                                               |                                       |     |
| Opmeer et al. (2016)     | -                                      | Rostral ACC                    | Increased activation at baseline was prognostic for remission                              | No                                    | Yes |
| Szczepanik et al. (2016) | Scopolamine                            | Amygdala                       | Increased activity at baseline was associated with symptoms improvement                    | Yes (limitation section) <sup>e</sup> | No  |
| Fang et al., (2017)      | Transcutaneous vagus nerve stimulation | Insula                         | Activation level at first stimulation session associated with clinical improvement         | No                                    | No  |
| Sankar, et al. (2017)    | Duloxetine                             | Left inferior frontal activity | Decreased activation following treatment                                                   | No                                    | Yes |
| Spies et al. (2017)      | Escitalopram                           | Precuneus and PCC              | Deactivation before treatment was related to change in symptoms after 2 weeks of treatment | No                                    | No  |
| Godlewska et al. (2018)  | Escitalopram                           | pgACC                          | Activity before treatment was able to predict response status (responder vs non-responder) | No                                    | No  |



|                             |     | at the level of individual participant         |                                                                                   |    |     |
|-----------------------------|-----|------------------------------------------------|-----------------------------------------------------------------------------------|----|-----|
|                             |     |                                                | Increased activation following treatment associated with better treatment outcome | No | Yes |
| Rubin-Falcone et al. (2018) | CBT | sgACC, medial prefrontal cortex, lingual gyrus |                                                                                   |    |     |

161

162 ACC: Anterior Cingulate Cortex; CBT: Cognitive Behavioral Therapy; dACC: dorsal Anterior Cingulate  
 163 Cortex; DLPFC: Dorsolateral Prefrontal Cortex; dmPFC: dorsomedial Prefrontal Cortex; mPFC : medial  
 164 Prefrontal Cortex ; MDD: Major Depressive Disorder; PCC : Posterior Cingulate Cortex; pgACC:  
 165 pregenual Anterior Cingulate Cortex; sgACC: subgenual Anterior Cingulate Cortex ; SSRI : selective  
 166 serotonin reuptake inhibitor

167

168 <sup>a</sup> "Test-retest effects were accounted for by the healthy control group, who underwent the same scans  
 169 at the same time points"

170 <sup>b</sup> "repeat fMRI assessment of healthy comparison subjects, as well as repeat assessment of the  
 171 depressed adolescents, thus providing assessment of expected test-retest reliability"

172 <sup>c</sup> "For analyses of change over time, a higher level fixed effects analysis was run for each subject,  
 173 contrasting parameter estimates within subject for the response to slides at the two time points of  
 174 interest."

175 <sup>d</sup>"perhaps in part reflecting the poor test-retest reliability of amygdala response to these emotional faces  
 176 [54], while resting-state fMRI data show greater robustness and reproducibility [55]. Test-retest reliability  
 177 of a neuroimaging measure becomes particularly important in the development of biomarkers for  
 178 prognosis and diagnosis [44]."

179 <sup>e</sup>"some investigators have raised concerns regarding the reliability of the BOLD signal (Boubela et al.,  
 180 2015). Nevertheless, studies have found that emotional stimuli evoke a consistent pattern of responsivity  
 181 over repeated sessions (Johnstone et al., 2005)."

182

### 183 **1.2.2. Results**

184 Though most of the reviewed studies could have reported test-retest reliability (i.e.,  
 185 participants performed two scans), most did not mention it. Seven mentioned reliability  
 186 in the discussion and only one reported test-retest reliability at the subject level; Siegle  
 187 et al. (2012) reported "sgACC z scores and reactivity had moderate test-retest  
 188 reliability in controls undergoing testing approximately 16 weeks apart (N=27; r=0.39

189 [P=0.04]). All but 1 had a pretest z score less than 0.5, and all but 2 had a posttest z  
190 score less than 0.5, suggesting stability within a restricted range.” Other studies that  
191 mention reliability describe stability of group effects. For example, “Test-retest effects  
192 were accounted for by the healthy control group, who underwent the same scans at  
193 the same time points” (Walsh et al., 2007) is often reported in the discussion. This  
194 technique, while valuable, does not yield estimates of test-retest reliability at the  
195 individual subject level; the absence of a main effect of Time is evidence of the lack of  
196 a mean shift, but not of the stability of participants ranks.

197

### 198 **1.3. rtfMRI-nf Studies Review**

199 Interventions that use biological measures as real-time targets, including rtfMRI-nf  
200 also implicitly assume reliability. rtfMRI-nf trains patients to regulate the hemodynamic  
201 activity in regions of interest (Decharms, 2008) with the hope that changing a causal  
202 mechanism will result in symptom changes. rtfMRI-nf appears useful for several clinical  
203 populations, including patients with MDD (Thibault et al., 2018). Most patients can  
204 learn volitional control of hemodynamic activity in a targeted brain region (Fovet et al.,  
205 2015) which has been associated with clinical improvements (Fovet et al., 2015;  
206 Linden, 2014; Linden et al., 2012; Young et al., 2014) suggesting potential translational  
207 applications (Decharms, 2008; Ruiz et al., 2014; Thibault et al., 2018). An implicit  
208 assumption of rtfMRI-nf is that the signal measured on one day represents the same  
209 quantity measured on subsequent days, and thus performance on that metric can be  
210 trained over days. Consequently, test-retest reliability seems a strong prerequisite.  
211 Thus, as for prediction studies, we considered whether test-retest reliability is being  
212 reported in the fMRI neurofeedback literature.

#### 213 **1.3.1. Method**

214 A PubMed search with the key words “(neurofeedback AND fMRI) OR rt-fMRI-nf)  
215 AND (depression OR MDD OR major depressive disorder” provided 44 results. After  
216 removing articles not including rtfMRI-nf or patients suffering from MDD, we were left  
217 with 11 studies (Table 2).

218

219 **Table 2: rt-fMRI-nf studies in Major Depressive Disorder and mention and**  
 220 **possibility of test-retest reliability**

| Reference                        | Neurofeedback  | ROI                                                                                                       | Mention of the reliability of the signal | Possibility to test signal reliability | How could they look at reliability                           |
|----------------------------------|----------------|-----------------------------------------------------------------------------------------------------------|------------------------------------------|----------------------------------------|--------------------------------------------------------------|
| Linden et al. (2012)             | Upregulation   | Functional localizer of brain areas involved in the generation of positive emotions (e.g., VLPLC, insula) | No                                       | Yes                                    | Same regions selected by the localizer on different sessions |
| Zotev, et al., (2014)            | Upregulation   | Left amygdala (anatomical)                                                                                | No                                       | No                                     | -                                                            |
| Young et al. (2014) <sup>a</sup> | Upregulation   | Left amygdala (anatomical)                                                                                | No                                       | Yes                                    | Reliability of fMRI signal in ROI                            |
| Yuan et al. (2014) <sup>a</sup>  | Upregulation   | Left amygdala (anatomical)                                                                                | No                                       | No                                     | -                                                            |
| Zotev et al. (2016) <sup>a</sup> | Upregulation   | Left amygdala (anatomical)                                                                                | No                                       | No                                     | -                                                            |
| Hamilton et al. (2016)           | Downregulation | Functional localizer of the salience network                                                              | No                                       | No                                     | -                                                            |
| Young et al. (2017) <sup>b</sup> | Upregulation   | Left amygdala (anatomical)                                                                                | No                                       | Yes                                    | Reliability of fMRI signal in ROI                            |

|                                           |                                 |                                                                                                                     |    |     |                                                              |
|-------------------------------------------|---------------------------------|---------------------------------------------------------------------------------------------------------------------|----|-----|--------------------------------------------------------------|
| Young, Misaki, et al. (2017) <sup>b</sup> | Upregulation                    | Left amygdala (anatomical)                                                                                          | No | Yes | Reliability of fMRI signal in ROI                            |
| Young et al. (2018) <sup>b</sup>          | Upregulation                    | Left amygdala (anatomical)                                                                                          | No | Yes | Reliability of fMRI signal in ROI                            |
| MacDuffie et al. (2018)                   | Upregulation and downregulation | Functional localizer of ACC                                                                                         | No | No  | -                                                            |
| Mehler et al. (2018)                      | Upregulation                    | Functional localizer of brain areas involved in seeing positive versus neutral pictures (e.g., insula and striatum) | No | Yes | Same regions selected by the localizer on different sessions |

221

222 ACC: Anterior Cingulate Cortex; VLPFC: Ventrolateral Prefrontal Cortex

223 *References associated with the same letter refer to the same data set*

### 224 **1.3.2. Results**

225 None of the examined fMRI-nf studies reported on the reliability of the signal being  
 226 trained (Table 2 and specific discussion of functional localizers in Box 4 in  
 227 supplements).

228

### 229 **1.4. Conclusions Thus Far**

230 MDD studies using fMRI for clinical prediction or treatment rarely mention reliability,  
 231 mirroring the more general fMRI literature (for meta-analysis, see Elliott et al., 2020).  
 232 This lack of reporting could be due to failure to consider psychometrics important, or  
 233 systematic decisions not to report observed low reliabilities. Indeed, reliability in  
 234 published fMRI research in non-clinical studies, across protocols, tasks, regions of  
 235 interest, psychological functions, and retest intervals have been fairly low (ICC~0.50),

236 with most published studies reporting values between 0.33-0.66. These values are  
237 mostly below “good” reliability thresholds for psychometrically sound clinical tests  
238 (~0.6).

239

## 240 **2. POTENTIAL WAYS TO OPTIMIZE TEST-RETEST RELIABILITY IN fMRI/rtfMRI-** 241 **NF**

242 To facilitate reporting of reliability in clinical studies as part of every-day  
243 neuroimaging-science, the remainder of this article is dedicated to introducing ways to  
244 report, improve, and increase clinical applicability of test-retest reliability for fMRI in  
245 clinical populations. We apply and evaluate these suggestions in two published data  
246 sets (Siegle et al., 2012; Young et al., 2017b).

247 There is already a strong literature on optimizing preprocessing, which can increase  
248 measurement of true signal, and thus reliability (Andersson et al., 2001; Miki et al.,  
249 2000; Oakes et al., 2005; Zhilkin and Alexander, 2004). We therefore begin by  
250 considering whether using alternate ways of indexing task-related reactivity in single-  
251 subject data with optimized preprocessing lead to improved test-retest reliability.

252 As each combination of task, design, scanner, preprocessing and analysis strategy  
253 has a unique value of reliability that cannot necessarily be generalized to other studies  
254 (Braver et al., 2010), it may be useful to have standardized generally applicable  
255 methods to find out which regions and analysis methods have sufficient psychometric  
256 qualities to be used as biomarkers or in which the signal is stable enough to be able to  
257 give relevant feedback of its activation.

258

### 259 **2.1. Optimize indices of task-related reactivity**

260 The first possibility we consider involves optimizing indices for task related  
261 reactivity in fMRI. This Blood Oxygen Level Dependent (BOLD) response is generally  
262 considered to be convolution of the time-course of neural activity with a physiological  
263 hemodynamic response. Mis-specification of the shape of BOLD reactivity can  
264 introduce inefficiency and noise into estimates, which decreases reliability in human  
265 (Handwerker et al., 2012; Lindquist et al., 2009; Shan et al., 2014) and animal models  
266 (Peng et al., 2019). If, for example, neural responses to task stimuli are sustained in  
267 depression rather than increased in amplitude (e.g., Mandell, Siegle, Shutt, Feldmiller,  
268 & Thase, 2014), standard indices such as the amplitude of the canonical BOLD  
269 response may not capture relevant aspects of the pathology.

270           Thus, we propose evaluating indices such as the average amplitude, area under  
271 the curve and timing/shape of the curve of the BOLD response in addition to its  
272 canonical amplitude. Gamma variate models, in particular, yield parameters for onset,  
273 rise and fall slopes, and magnitude of hemodynamic responses (e.g., Larson et al.,  
274 2006), which can be evaluated for reliability. Similarly, including temporal and  
275 dispersion derivatives can account for individual differences in peak response timing  
276 and small differences in HRF length, providing larger test-retest reliability values  
277 (Fournier et al., 2014).

278

## 279 **2.2. Examine Regions with Voxel-Wise High Test-Retest Reliability**

280           When considering task-related reactivity in a region of interest (ROI), it is useful  
281 to reduce voxelwise reactivity to a single or few indices which capture reactivity across  
282 the region as a whole. The same consideration applies for reliability. Caceres et. al.  
283 (2009) suggest computing the ICC in each voxel within a region of interest (ROI) and  
284 reporting the median ICC as an index of region's test-retest reliability. This approach  
285 has been applied practically (Fournier et al., 2014; Lois et al., 2018). However, several  
286 potential biomarkers and neurofeedback targets identified in the literature, including  
287 the amygdala (Lebow and Chen, 2016; Young et al., 2014) and the sgACC (Siegle et  
288 al., 2012), consist of subregions with anatomical and functional heterogeneity  
289 (Hrybouski et al., 2016; Palomero-Gallagher et al., 2019). Their reliability may not be  
290 the same across these sub-divisions (Brabec et al., 2010; Janak and Tye, 2015;  
291 LeDoux, 2012). Therefore, it is possible that only some parts of ROIs may have  
292 adequate reliability and that the median reliability will not capture the most reliable  
293 parts of the signal. Just as questionnaires are traditionally constructed by eliminating  
294 unreliable items from an initial theoretically plausible set (Sheatsley, 1983), an index  
295 that inherits solely from the reliable voxels may increase psychometric properties of  
296 the preserved portions of regions.

297           Ten years ago, Bennet and Miller (2010) suggested that voxelwise reliability  
298 constitutes the most rigorous criteria of reliability since it implies that the level of activity  
299 in all voxels should remain consistent between scans. Although few studies have used  
300 this approach, we contend the available psychometric arguments weight in favor of  
301 voxel-wise computation of ICCs, restricting "reliable" ROIs to those regions in which all  
302 voxels have good or excellent reliability.

303

### 304 **2.3. Optimize Models to Account for Individual and Clinical Features**

305 Minimizing sources of non-interest that could vary between administrations  
306 increases the reliability of acquired data (Lin and Monica Way, 2014). Some fMRI noise  
307 sources such as differences in instrumentation, time of day, motion, etc. can be  
308 controlled, to some extent, via design. Tasks can be selected which have few practice  
309 effects and pre-baseline training can remove practice and strategy-development  
310 effects (Barch and Mathalon, 2011; Palmer et al., 2018). Choosing as-simple-as-  
311 possible tasks can minimize the impact of non-task cognitive processes. Standardizing  
312 instructions and training procedures helps to ensure participants understand the task  
313 before the first administration (Barch and Mathalon, 2011). Effects of other time-  
314 varying noise sources, such as thermal and physiological noise, are routinely  
315 minimized via preprocessing procedures (Krüger and Glover, 2001).

316 That said, if sources of variation across time, such as physiological or cognitive  
317 features, cannot be fully managed within design or processing, statistical methods for  
318 adjusting test-retest reliability estimates for them (Atri et al., 2011; Hsiao et al., 2011;  
319 Laenen et al., 2006) may be important to consider. Indeed, individual differences in  
320 state anxiety can account for amygdala activation (Calder et al., 2011) and habituation  
321 (Sladky et al., 2012), and, variation in rumination in depression is continuously  
322 associated with individual differences in amygdala, hippocampal, and prefrontal  
323 reactivity to emotional stimuli (Mandell et al., 2014; Siegle et al., 2002). Thus, true  
324 signal differences due to anxiety, mood or other symptoms between scans, especially  
325 if test-retest reliability is being evaluated in the context of possible treatment-related  
326 effects, might account for apparently unreliable neural responses, particularly to  
327 emotional stimuli. Thus, it may be useful to account for individuals' differences that  
328 could change across time statistically in estimating reliability, e.g., via the inclusion of  
329 clinical covariates.

330

### 331 **2.4. Examine Reliability Within Relevant Tasks and Clinical Populations**

332 Estimating reliability in healthy participants or symptomatic individuals who do  
333 not receive intervention may help separate effects of symptom change from practice  
334 effects. Yet, these approaches can introduce other confounds (e.g., if a task is reliable  
335 in patients but not controls or non-treatment seeking symptomatic individuals). The  
336 majority of studies have examined reliability of fMRI data in homogenous samples of  
337 healthy, often young, university students (Bennett and Miller, 2010; Lois et al., 2018).

338 Studies reviewed in Table 1 that discuss reliability in MDD generally restrict their  
339 discussion to whether there was a main effect of Time in healthy controls. Generally,  
340 BOLD response variability is greater in forms of between-subject responses than within  
341 (Aguirre et al., 1998). A limitation of ICC is that simultaneous inclusion of within and  
342 between subject variability causes estimators to be affected by sample composition.  
343 As groups might differ in the degree to which regional signals are reliable between  
344 measurements (Fournier et al., 2014), and because ICCs are proportional to between  
345 subject variability, heterogeneous samples can produce different ICCs even with the  
346 same degree of within-subject reliability of test-retest values. Using only healthy control  
347 participants may underrepresent true variability or over represent measurement errors  
348 in the population of interest, yielding inaccurate reliability estimates. Similarly, non-  
349 treatment seeking patients differ from treatment seeking patients on many variables  
350 that could affect test-retest reliability, such as symptomatology and comorbidity  
351 (Galbaud Du Fort et al., 1999).

352 Thus, testing reliability in the population of interest may provide more accurate  
353 estimates. We therefore recommend the use of representative samples to create a  
354 voxel-wise, population- and task-specific map of test-retest reliability. For example, if  
355 a task is to be used to distinguish symptomatic from healthy individuals, this method  
356 should be applied to a mixed population of healthy and symptomatic participants prior  
357 to the clinical application of the task. If the purpose is to distinguish respondents and  
358 non-respondents to a treatment, we recommend assessing reliability among  
359 treatment-seeking patients.

360

### 361 **3. EVALUATION OF SUGGESTED OPTIMIZATIONS IN A PROGNOSTIC** 362 **NEUROIMAGING TREATMENT OUTCOME DATASET**

363 We have described several approaches that could be useful when examining  
364 and seeking to improve test-retest reliability in service of clinical translation including  
365 R1) optimizing BOLD signal parameterization, R2) using regions or voxels with  
366 stronger psychometric properties, R3) accounting for within-individual changes and  
367 R4) studying relevant tasks and populations for the intended application. In this section  
368 we demonstrate feasibility of these approaches and examine whether they are useful  
369 when applied to a published clinical fMRI dataset (Siegle et al., 2012). Our code for  
370 these analyses is freely available from [https://github.com/PICANlab/Reliability\\_toolbox](https://github.com/PICANlab/Reliability_toolbox)  
371 in the folder named “activation\_task\_reliability”.



372 **3.1. Method**

373 The sample consisted of participants described in Siegle et al. (2012)  
374 augmented by the addition of 8 patients who completed the same protocol after that  
375 paper was submitted, yielding 57 patients with major depressive disorder (MDD), and  
376 35 healthy control participants (see supplement for details of this dataset and its  
377 relationship to Siegle et al 2012). Briefly, participants with MDD completed a slow  
378 event-related task during 3T fMRI in which they labeled the valence of emotional words  
379 (here, as in the published dataset, we analyzed only nominally negative words) before  
380 and after 12-16 weeks of Cognitive Therapy.

381 We computed reliability estimates within 4 ROIs which the literature suggests  
382 may function as biomarkers for treatment response including the amygdala (Arnone et  
383 al., 2012; Godlewska et al., 2012; Sheline et al., 2001), dorsolateral prefrontal cortex  
384 (DLPFC, Koenigs and Grafman, 2009), rostral anterior cingulate cortex (rACC, Hunter  
385 et al., 2013) and subgenual cingulate cortex (sgACC, Siegle et al., 2012b; Straub et  
386 al., 2015; Taylor et al., 2018) (our region-wise definitions are included in Box 1 in  
387 Supplement).

388 **3.1.1. Optimize the BOLD Signal**

389 The BOLD response to negative words was modeled within participants using  
390 4 different methods including 1) amplitude of a canonically shaped BOLD signal (using  
391 AFNI's 3dDeconvolve with a narrow tent function ('BLOCK5(1,1)', Cox, 1996), 2) Area  
392 under the curve (via multiple regression of a delta function across 8 TRs using  
393 3dDeconvolve, i.e. computed with Finite Impulse Response/FIR basis, with sum of  
394 betas as the parameter retained); 3) Peak amplitude from the same regressions as #2,  
395 and 4) a gamma variate model with parameters for onset-delay, rise-decay rate, and  
396 height. Voxelwise outliers outside the Tukey hinges were windsorized across  
397 participants and ICCs (3,1) were computed (Shrout and Fleiss, 1979) within individuals  
398 for each modeling method using custom Matlab code. While ICC(2,1) allows  
399 generalizing results obtained from different scanners, we chose to use ICC(3,1) to be  
400 able to compare with most of the literature, given that it is the most widely used ICC.  
401 This approach also allowed us to examine the importance of including scanner as a  
402 covariate in 3.1.3.

403 **3.1.2. Compute Voxelwise Reliability**

404 To measure the benefit of identifying reliable voxels, we calculated the mean,  
405 median and standard deviation of the ICCs in each of the ROIs for each modeling  
406 method and each group.

### 407 **3.1.3. Include Clinical and Design Related Measures**

408 We examined whether indices of reliability increased when clinical and design-  
409 related measures were included. As the ICC does not easily allow inclusion of  
410 covariates, we used semi partial correlations within the context of multiple regressions  
411 with and without covariates to assess changes in reliability, where covariates were pre  
412 and post clinical measures, as:

$$413 \widehat{Post} = \beta_0 + \beta(1 \rightarrow n)covariates + \beta(n + 1)Pre$$

414 This model accounts for the potential that participants who show little change in  
415 symptoms may have better test-retest reliability. Modelling these clinical effects at the  
416 group level should make it possible to identify variance unique to test-retest reliability.

417 We included indices of pre- and post-treatment depressive symptomatology  
418 (Beck Depression Inventory; BDI, Beck et al., 1996), state and trait anxiety  
419 (Spielberger, 1983), rumination (Nolen-Hoeksema et al., 1993), and sleepiness  
420 (Johns, 1991) administered on the scan day, the scanner on which data were acquired,  
421 and participant's group when patients and controls were considered in one sample,  
422 coded as dummy variables, as covariates. Missing data were imputed via regression  
423 from the other administered measures also used as covariates.

424 A primary question was whether any of the proposed techniques described  
425 above, including different BOLD models, accounting for voxelwise variability, and the  
426 use of covariates, would differentially affect reliability estimates (i.e., semi-partial  
427 correlations). As such, after computing reliability estimates at each voxel, we rank  
428 ordered them across all permutations of BOLD estimate parameters (6 parameters)  
429 and the use or non-use of covariates (2 conditions) at each voxel per ROI, yielding 12  
430 x #-voxels rankings per ROI. Following a Kolmogorov-Smirnov test justifying the need  
431 to use non-parametric tests, we report a Kruskal-Wallis test to determine whether the  
432 rankings differed across models in each ROI. If they did, as a simple effects test, we  
433 generated confidence intervals around the mean of rankings for each of the 12  
434 conditions via a one-way ANOVA (via Matlab's multcompare function). Non-  
435 overlapping confidence intervals are interpretable as significant differences between  
436 one condition and any other. To display them we generated figures showing the mean

437 of rankings for each condition, which will be numbers on the order of 1 to 12 x # voxels,  
438 with higher means representing being at the top of the rankings across many voxels  
439 within the ROI.

#### 440 **3.1.4. Use Clinically Representative Samples**

441 All analyses were conducted on the whole sample (controls and patients) to  
442 establish likely reliability of tests that could be used to discriminate groups, and on  
443 patients only, to establish likely reliability of clinical prognostic and change indicators.  
444 We considered multiple reliability effect size thresholds which might be used in other  
445 studies (0.4 and 0.6 for fair and good reliability and 0.7, and 0.75 for traditional labels  
446 of the data as “reliable” and clinically meaningful).

#### 447 **3.1.5. Type 1 error control**

448 As 1) each of the hypotheses and regions examined for this manuscript was  
449 considered a different family of tests and 2) we want our results to generalize to  
450 reliability as it is reported in the confirmatory biomarker and neurofeedback literatures  
451 where only one region is generally examined, consistent with the literature on test-  
452 retest reliability in neuroimaging, type I error was not controlled across regions and  
453 hypotheses for ROI-wise statistics. For simple-effects tests of differences in rankings  
454 across conditions, we controlled for the number of conditions with a Bonferroni test.  
455 For voxelwise statistics we subjected all voxelwise residual maps to empirical cluster  
456 thresholding (AFNI's 3dFWHMx and 3dClustSim, acf model with small-volume  
457 corrections for examined regions) using a p threshold (-pthr) based on each considered  
458 effect size threshold (see in supplementary materials, table S3 for more details).

459

### 460 **3.2. Results and discussion**

#### 461 **3.2.1. Optimizing the BOLD signal**

462 ICC's were uniformly low (<.3) for all BOLD parameterizations when entire ROIs  
463 were considered (Table 4). Kruskal Wallis tests did suggest differential reliability across  
464 our parameterizations (Table 5a). This held when the two outlying uniformly low  
465 reliability parameterizations (rise decay with and without covariates) were removed  
466 from consideration (Table 5b). Yet, there were non-overlapping confidence intervals  
467 among counts of rank orderings of parameterizations for voxelwise tests, suggesting  
468 that at least for some subsets of regions, some parameterizations were superior  
469 (Supplement Figure S1, Table S1). For example, in the full sample, for the amygdala,  
470 amplitude without covariates was superior to other parameters. Over all ROIs, the most

471 reliable parameters were amplitude, canonical amplitude, and height (Figure 1 shows  
472 voxelwise variation within a Priori ROIs for the height parameter) for the whole sample  
473 and amplitude, area under the curve, and height for only patients (Figure S1 and Table  
474 S1). However, looking at ROIs and samples independently, the parameter offering the  
475 highest levels of reliability varied.

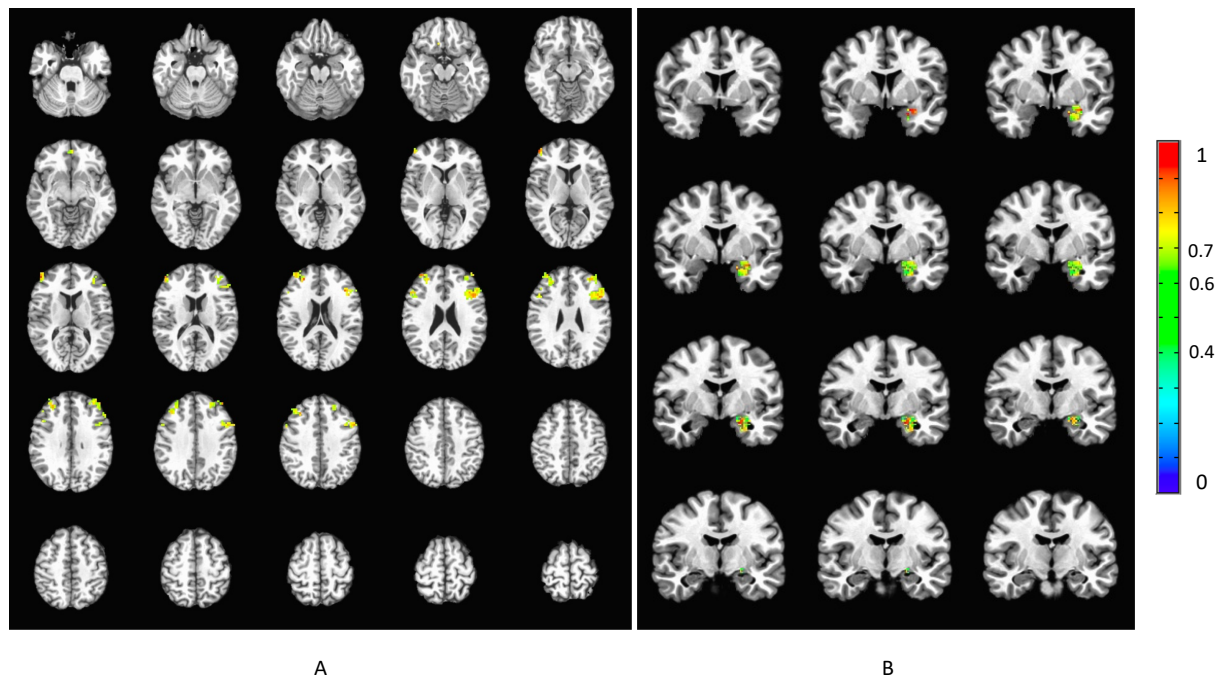

476  
477 **Figure 1: Test-retest reliability in ROIs estimated with voxel wise ICCs using**  
478 **height parameter, a threshold of  $ICC > 0.4$  and cluster correction applied for this**  
479 **threshold in A. Siegle et al. (2012) dataset of patients and B. Young et al. (2017)**  
480 **data set of the transfer run in the experimental group (signal with training)**  
481 **preprocessed with the TBV style pipeline.**

482

### 483 3.2.2. Voxelwise reliability

484 In the whole sample, moderate reliability ( $ICC > .4$ ) in clusters large enough to  
485 infer significance was observed in the DLPFC using the canonical amplitude model  
486 and in the amygdala using amplitude (Table 3). “Good” ( $ICC > .6$ ) reliability was reached  
487 in clusters large enough to infer significance when only the patients were considered,  
488 using amplitude and height in the DLPFC. These levels of voxelwise test-retest  
489 reliability were higher than using the median or mean value of ICCs within whole ROIs  
490 (Table 4). Levels of generally accepted reliability for clinical measures ( $ICC > .7$ ) were  
491 not observed in clusters large enough to report.

492 **Table 3: Table of number of voxels reaching different reliability thresholds for**  
 493 **each sample, first level parameter, and ROI with cluster correction applied.**

| ROI                        |                            | Amygdala<br>(242<br>voxels) |     | DLPFC<br>(2675<br>voxels) |     | rACC<br>(865<br>voxels) |     | sgACC<br>liberally<br>thresholded<br>(33 voxels) |     | sgACC<br>conservatively<br>thresholded<br>(18 voxels) |     |
|----------------------------|----------------------------|-----------------------------|-----|---------------------------|-----|-------------------------|-----|--------------------------------------------------|-----|-------------------------------------------------------|-----|
| Population                 | Reactivity<br>model        | ICC<br>thresholds           |     | ICC<br>thresholds         |     | ICC<br>thresholds       |     | ICC<br>thresholds                                |     | ICC thresholds                                        |     |
|                            |                            | 0.4                         | 0.6 | 0.4                       | 0.6 | 0.4                     | 0.6 | 0.4                                              | 0.6 | 0.4                                                   | 0.6 |
| Controls &<br>patients     | Canonical<br>amplitude     | 0                           | 0   | 465                       | 0   | 0                       | 0   | 0                                                | 0   | 0                                                     | 0   |
|                            | Amplitude                  | 66                          | 0   | 5                         | 0   | 0                       | 0   | 0                                                | 0   | 0                                                     | 0   |
|                            | Area<br>under the<br>curve | 10                          | 0   | 0                         | 0   | 0                       | 0   | 0                                                | 0   | 0                                                     | 0   |
|                            | Onset<br>delay             | 0                           | 0   | 0                         | 0   | 0                       | 0   | 0                                                | 0   | 0                                                     | 0   |
|                            | Rise decay                 | 0                           | 0   | 0                         | 0   | 0                       | 0   | 0                                                | 0   | 0                                                     | 0   |
|                            | Height                     | 0                           | 0   | 290                       | 2   | 0                       | 0   | 0                                                | 0   | 0                                                     | 0   |
|                            | Patients                   | Canonical<br>amplitude      | 0   | 0                         | 299 | 6                       | 6   | 0                                                | 0   | 0                                                     | 0   |
| Amplitude                  |                            | 24                          | 0   | 0                         | 0   | 0                       | 0   | 0                                                | 0   | 0                                                     | 0   |
| Area<br>under the<br>curve |                            | 0                           | 0   | 0                         | 0   | 0                       | 0   | 0                                                | 0   | 0                                                     | 0   |
| Onset<br>delay             |                            | 0                           | 0   | 0                         | 0   | 0                       | 0   | 0                                                | 0   | 0                                                     | 0   |
| Rise decay                 |                            | 0                           | 0   | 0                         | 0   | 0                       | 0   | 0                                                | 0   | 0                                                     | 0   |
| Height                     |                            | 0                           | 0   | 374                       | 5   | 5                       | 0   | 2                                                | 0   | 1                                                     | 0   |

494

495 **Table 4: Table of mean, standard deviation and median values of ICCs for each**  
 496 **sample, reactivity model, and ROI.**

| Population             | Reactivity<br>model    | Amygdala                     | DLPFC                   | rACC                    | sgACC<br>liberally<br>thresholded | sgACC<br>conservatively<br>thresholded |
|------------------------|------------------------|------------------------------|-------------------------|-------------------------|-----------------------------------|----------------------------------------|
| Controls &<br>patients | Canonical<br>amplitude | 0.11 ( $\pm 0.09$ );<br>0.11 | 0.24<br>( $\pm 0.16$ ); | 0.09<br>( $\pm 0.10$ ); | 0.15 ( $\pm 0.08$ );<br>0.13      | 0.17 ( $\pm 0.09$ );<br>0.18           |

|                             |                |            |            |                |                  |
|-----------------------------|----------------|------------|------------|----------------|------------------|
|                             |                | 0.26       | 0.09       |                |                  |
| <b>Amplitude</b>            | 0.23(±0.14);   | 0.12       | 0.11       | -0.01 (±0.13); | -0.04 (±0.14); - |
|                             | 0.22           | (±0.11);   | (±0.10);   | -0.04          | 0.08             |
| <b>Area under the curve</b> | 0.13 (±0.14);  | 0.08       | 0.03       | -0.03 (±0.09); | -0.06 (±0.10); - |
|                             | 0.12           | (±0.10);   | (±0.11);   | -0.04          | 0.07             |
| <b>Onset delay</b>          | 0 (±0.09); -   | 0.01       | 0 (±0.10); | 0 (±0.08);     | -0.01 (±0.10); 0 |
|                             | 0.01           | (±0.09); 0 | 0          | 0.01           |                  |
| <b>Rise decay</b>           | 0 (±0); 0      | 0 (±0); 0  | 0 (±0); 0  | 0 (±0); 0      | 0 (±0); 0        |
| <b>Height</b>               | 0.08 (±0.10);  | 0.21       | 0.13       | 0.16 (±0.12);  | 0.18 (±0.12);    |
|                             | 0.09           | (±0.15);   | (±0.12);   | 0.17           | 0.23             |
| <b>Canonical amplitude</b>  | 0.09(±0.11);   | 0.22       | 0.08       | 0.10 (±0.12);  | 0.14 (±0.15);    |
|                             | 0.11           | (±0.16);   | (±0.14);   | 0.07           | 0.12             |
| <b>Amplitude</b>            | 0.22 (±0.15);  | 0.11       | 0.10       | -0.06 (±0.15); | -0.08 (±0.14); - |
|                             | 0.22           | (±0.13);   | (±0.13);   | -0.07          | 0.08             |
| <b>Area under the curve</b> | 0.13(±0.14);   | 0.6        | 0.03       | -0.08 (±0.13); | -0.10 (±0.13); - |
|                             | 0.12           | (±0.12);   | (±0.13);   | -0.08          | 0.09             |
| <b>Onset delay</b>          | -0.01 (±0.12); | 0.01       | -0.01      | 0.02 (±0.11);  | 0.01 (±0.12);    |
|                             | -0.01          | (±0.12); 0 | (±0.13); - | 0.02           | 0.05             |
| <b>Rise decay</b>           | 0 (±0); 0      | 0 (±0); 0  | 0 (±0); 0  | 0 (±0); 0      | 0 (±0); 0        |
| <b>Height</b>               | 0.09 (±0.12);  | 0.22       | 0.12       | 0.16 (±0.17);  | 0.17 (±0.17);    |
|                             | 0.08           | (±0.16);   | (±0.15);   | 0.18           | 0.21             |
|                             |                | 0.23       | 0.13       |                |                  |

497 Mean (±standard deviation); median

498

499 **Table 5a: Table of Kruskal Wallis tests' output for each sample, reactivity model**  
 500 **with and without covariates, and ROI with Bonferroni correction applied.**

| Population          | Amygdala               | DLPFC                   | rACC                   | sgACC                 | sgACC                      |
|---------------------|------------------------|-------------------------|------------------------|-----------------------|----------------------------|
|                     |                        |                         |                        | liberally thresholded | conservatively thresholded |
| Controls & patients | H(11)=1414.67, p<0.001 | H(11)=12717.07, p<0.001 | H(11)=4794.14, p<0.001 | H(11)=206.47, p<0.001 | H(11)=118.32, p<0.001      |

|                 |                           |                            |                           |                          |                          |
|-----------------|---------------------------|----------------------------|---------------------------|--------------------------|--------------------------|
| <b>Patients</b> | H(11)=1233.13,<br>p<0.001 | H(11)=10371.75,<br>p<0.001 | H(11)=4477.55,<br>p<0.001 | H(11)=240.89,<br>p<0.001 | H(11)=136.93,<br>p<0.001 |
|-----------------|---------------------------|----------------------------|---------------------------|--------------------------|--------------------------|

501 **Note: Applying Bonferroni correction for 6 reactivity models with and without**  
 502 **covariates ( $p < 0.05/12 = 0.004$ ).**

503

504 **Table 5b: Table of Kruskal Wallis tests' output for each sample, reactivity model**  
 505 **with and without covariates, and ROI with Bonferroni correction applied, without**  
 506 **rise decay.**

| Population             | Amygdala                | DLPFC                    | rACC                    | sgACC liberally<br>thresholded | sgACC<br>conservatively<br>thresholded |
|------------------------|-------------------------|--------------------------|-------------------------|--------------------------------|----------------------------------------|
| Controls &<br>patients | H(9)=285.88,<br>p<0.001 | H(9)=4876.99,<br>p<0.001 | H(9)=644.19,<br>p<0.001 | H(9)=58.90,<br>p<0.001         | H(9)=40.55,<br>p<0.001                 |
| Patients               | H(9)=25.68,<br>p=0.002  | H(9)=1588.15,<br>p<0.001 | H(9)=190.42,<br>p<0.001 | H(9)=108.21,<br>p<0.001        | H(9)=67.20,<br>p<0.001                 |

507 **Note: Applying Bonferroni correction for 6 reactivity models with and without**  
 508 **covariates ( $p < 0.05/10 = 0.005$ ).**

509

### 510 **3.2.3. Clinical and Design Related Measures**

511 The addition of covariates never resulted in significantly higher average ranks  
 512 for semi partial correlations in any ROI, in the whole sample or just the patients (Figure  
 513 S1). In other words, adding covariates did not improve the reliability, and in some  
 514 instances made it worse.

515

## 516 **4. EVALUATION OF SUGGESTED OPTIMIZATIONS IN AN EMPIRICAL** 517 **NEUROFEEDBACK DATASET**

518 To further support the feasibility of applying these recommendations and to  
 519 evaluate the consistency of their performance in a second dataset, we consider a  
 520 published fMRI neurofeedback dataset (Young, Siegle, et al., 2017, code available  
 521 from [https://github.com/PICANlab/Reliability\\_toolbox](https://github.com/PICANlab/Reliability_toolbox) in the folder named “rtfMRI-  
 522 nf\_reliability”).

523

### 524 **4.1. Method**

525 This dataset constituted 18 patients in the experimental group who received  
 526 amygdala neurofeedback and 16 patients in the control group who received parietal

527 neurofeedback. Briefly, participants completed two training scans on different days  
528 within 2 weeks, each including a “baseline” and “transfer” runs during which no  
529 feedback was presented. The analyzed task was a 40-second per block design during  
530 which participants alternately rested, worked to upregulate a target region during recall  
531 of positive memories, and did a distraction (counting) task (see supplement Box 5 for  
532 details of this dataset). Here, we focus on a) the baseline data on the two training days  
533 in control-feedback participants during recall of positive autobiographical memories  
534 prior to neurofeedback training. As their amygdala signal did not change over the  
535 course of the study at the group level (Young et al., 2017b), this allows us to examine  
536 test-retest reliability of the left amygdala signal without the influence of neurofeedback.  
537 b) the left amygdala signal during the two transfer runs in the experimental group, as  
538 this represents the effect of neurofeedback training. Activity during the two post-  
539 training transfer runs did not differ at the group level, allowing us to examine the test-  
540 retest reliability of the amygdala signal after neurofeedback training. Because this  
541 dataset only included patients with MDD, only the first 3 principles (i.e., optimization of  
542 the BOLD signal, computation of voxelwise reliability, and inclusion of clinical and  
543 design related measures) are evaluated in this dataset.

#### 544 *Feedback signal*

545 To analyze the feedback signal averaged over the left amygdala we used the  
546 output of the script used in Young, Siegle, et al. (2017) that allowed computation of the  
547 feedback signal in real-time before considering the voxel-wise signal.

#### 548 *Voxel-wise*

549 As rtfMRI-nf involves real-time preprocessing of the data, we sought to examine  
550 whether this kind of preprocessing could affect the test-retest reliability of the signal.  
551 We therefore performed data preprocessing emulating the real-time data processing  
552 performed by the commercially available neurofeedback software Turbo BrainVoyager  
553 (BrainVoyager, The Netherlands; henceforth “TBV style”) and a more classic  
554 contemporary post-hoc preprocessing stream (here referred to as “standard  
555 preprocessing”). Both streams were implemented using AFNI.

#### 556 - TBV style preprocessing

557 Turbo BrainVoyager performs the following functions in real-time: 3D motion  
558 correction, spatial smoothing, and drift removal via the design matrix. We used AFNI  
559 to approximate these steps. After spatially transforming the anatomical then functionals  
560 to the International Consortium for Brain Mapping 152 template, we then rescaled them



561 to conform to the Talairach atlas dimensions and then performed motion correction to  
562 the first image, spatial smoothing 4mm FWHM smoothing kernel and fourth order  
563 detrend for drift removal.

564 - Standard preprocessing

565 MRI pre-processing included despiking, volume registration and slice timing correction  
566 for all EPI volumes in a given exam. After applying an intensity uniformity correction  
567 on the anatomical, the anatomical was spatially transformed to the International  
568 Consortium for Brain Mapping 152 template and rescaled to conform to the Talairach  
569 atlas dimensions. Then, the fMRI data for each run were warped nonlinearly and the  
570 same spatial transformations were applied. The fMRI run was spatially smoothed  
571 within the grey matter mask using a Gaussian kernel with full width at half maximum  
572 (FWHM) of 4 mm. A first standard GLM analysis was then applied separately for each  
573 of the fMRI runs. The following regressors were included in the GLM model: six motion  
574 parameters and their derivatives as nuisance covariates to take into account possible  
575 artifacts caused by head motion, white matter and cerebrospinal fluid signals, and five  
576 polynomial terms for modeling drift.

577 **4.1.1. Optimize the BOLD Signal**

578 **4.1.1.1. Amygdala signal**

579 From each participant's real-time left amygdala signal we calculated an  
580 "amygdala signal" for each positive recall block minus the mean of the preceding rest  
581 block from the output of previously used scripts for real-time preprocessing (Young et  
582 al., 2017b), and recreated the feedback signal by taking the amount of activation at  
583 every TR during the experimental condition minus the mean activation in the previous  
584 rest condition, on the baseline run of control participants at visits 1 and 2 (signal without  
585 training) and on the transfer run of experimental participants at visits 1 and 2 (signal  
586 with training), independently. We then averaged the time course of the feedback signal  
587 over all happy blocks. We summarized the activation for each participant for each visit  
588 by either a mean of the amygdala signal or by fitting the time course with a gamma  
589 variate model with parameters for onset-delay, rise-decay-rate, and height (see  
590 Methodological choice to fit gamma variates in Supplement Box 2 for more information  
591 of this methodological choice).

592 ICC(3,1) estimates were computed (Shrout and Fleiss, 1979) independently on the  
593 estimates of the feedback signal with and without training.

594 **4.1.1.2. Voxelwise signal**

595 The same reactivity models as in the treatment outcome dataset were applied (see  
596 part 3.2.1.1) to data preprocessed with both types of preprocessing but adapted to this  
597 design (AFNI tent parameters to accommodate 40 s blocks as BLOCK(40,1), and area  
598 under the curve across entire blocks).

#### 599 **4.1.2. Compute Voxelwise Reliability**

600 As in the treatment outcome data set, to measure the benefit of identifying  
601 reliable voxels, we calculated the mean, median and standard deviation of the ICCs in  
602 the left amygdala for each model, group, and additionally for both preprocessing  
603 pipelines.

#### 604 **4.1.3. Include Clinical and Design Related Measures**

605 As in the treatment outcome data set, semi partial correlations were computed  
606 with and without covariates. We included indices of depressive symptomatology (Beck  
607 Depression Inventory; BDI, Beck et al., 1996), state and trait anxiety (Spielberger,  
608 1983), sleepiness and drowsiness administered on the scan day, and the scanner on  
609 which data were acquired coded as dummy variables, as covariates. There was no  
610 missing data. We then compared the semi-partial correlations across all models of  
611 individual responses with and without covariates for each group and preprocessing  
612 pipeline as in section 3.1.3, to understand which models offered adequate test-retest  
613 reliability and whether there were differences between them.

#### 614 **4.1.4. Type 1 error control**

615 As discussed in section 3.1.5, cluster correction was applied on voxelwise  
616 statistics (further details in supplement table S4).

### 617 **4.2. Results and discussion**

#### 618 **4.2.1. Optimizing the BOLD signal**

##### 619 **4.2.1.1. Amygdala signal**

620 The mean amygdala signals with and without training showed poor reliability  
621 (ICCs<0.1). When the amygdala signal within the left amygdala was fit using a gamma  
622 variate function, the onset-delay and height parameters showed fair reliability for the  
623 signal without training (ICC=0.54 and ICC=0.47, respectively), with all other models,  
624 including those with training, showing minimal reliability (ICC<.1). Therefore, it appears  
625 that the shape of the signal without training is consistent across sessions and that the  
626 signal in the left amygdala is more reliable when unchanged by training, which is  
627 consistent with the assumption that training is changing the signal over time.

##### 628 **4.2.1.2. Voxel-wise signal**

629 Kruskal Wallis tests suggested there were differences between the parameters  
630 in reliability (Tables 6a and 6b). In particular, reliability for the height parameter (as well  
631 as amplitude for the signal without training) was higher than for other parameters  
632 (Figure S1). The height parameter also yielded a large enough cluster to infer  
633 significance for “excellent” ( $ICC > .7$ ) reliability in both samples (Table 7, Figure 1 for  
634 illustration).

635 The use of the standard preprocessing stream had non-significantly-different  
636 reliabilities from the stream emulating the real-time preprocessing run by Turbo  
637 BrainVoyager over all parameters with or without covariates, with the exception of the  
638 height parameter without covariates, which showed higher reliability with TBV style  
639 preprocessing than with standard preprocessing in the signal without training (see  
640 Figure S1).

641

642 **Table 6a: Table of Kruskal Wallis tests’ output for each sample, reactivity model**  
643 **with and without covariates in the left amygdala with Bonferroni correction**  
644 **applied.**

| Population                              | Amygdala                  |
|-----------------------------------------|---------------------------|
| Without training - Control - Baseline   | H(23)=2964.56,<br>p<0.001 |
| With training - Experimental - Transfer | H(23)=3142.17,<br>p<0.001 |

645 **Note: Applying Bonferroni correction for 6 reactivity models with and without**  
646 **covariates ( $p < 0.05/12 = 0.004$ ).**

647 **Table 6b: Table of Kruskal Wallis tests’ output for each sample, reactivity model**  
648 **with and without covariates in the left amygdala with Bonferroni correction**  
649 **applied, without rise decay.**

| Population                              | Amygdala                  |
|-----------------------------------------|---------------------------|
| Without training - Control - Baseline   | H(19)=1397.84,<br>p<0.001 |
| With training - Experimental - Transfer | H(19)=1702.57,<br>p<0.001 |

650 **Note: Applying Bonferroni correction for 6 reactivity models with and without**  
651 **covariates ( $p < 0.05/10 = 0.005$ ).**

652

653 **Table 7: Table of number of voxels reaching different reliability thresholds for**  
 654 **each sample, preprocessing, and first level parameter with cluster correction**  
 655 **applied.**

| ROI                                     |                      | Amygdala (214 voxels) |     |     |      |                |     |     |      |
|-----------------------------------------|----------------------|-----------------------|-----|-----|------|----------------|-----|-----|------|
| Preprocessing                           |                      | BV style              |     |     |      | Standard       |     |     |      |
| Population                              | First level model    | ICC thresholds        |     |     |      | ICC thresholds |     |     |      |
|                                         |                      | 0.4                   | 0.6 | 0.7 | 0.75 | 0.4            | 0.6 | 0.7 | 0.75 |
| Without training - Control - Baseline   | Canonical amplitude  | 0                     | 0   | 0   | 0    | 0              | 0   | 0   | 0    |
|                                         | Amplitude            | 52                    | 16  | 6   | 2    | 35             | 0   | 0   | 0    |
|                                         | Area under the curve | 0                     | 0   | 0   | 0    | 40             | 0   | 0   | 0    |
|                                         | Onset-delay          | 0                     | 0   | 0   | 0    | 0              | 0   | 0   | 0    |
|                                         | Rise-decay           | 0                     | 0   | 0   | 0    | 0              | 0   | 0   | 0    |
|                                         | Height               | 78                    | 26  | 13  | 13   | 53             | 24  | 9   | 5    |
| With training - Experimental - Transfer | Canonical amplitude  | 0                     | 0   | 0   | 0    | 0              | 0   | 0   | 0    |
|                                         | Amplitude            | 66                    | 4   | 2   | 2    | 42             | 11  | 3   | 2    |
|                                         | Area under the curve | 0                     | 0   | 0   | 0    | 0              | 0   | 0   | 0    |
|                                         | Onset-delay          | 0                     | 4   | 4   | 4    | 0              | 5   | 5   | 5    |
|                                         | Rise-decay           | 0                     | 0   | 0   | 0    | 0              | 0   | 0   | 0    |
|                                         | Height               | 159                   | 81  | 25  | 16   | 73             | 47  | 24  | 21   |

656

657 **4.2.2. Voxelwise reliability**

658 Some voxelwise ICC values obtained were higher than those computed on the  
 659 real-time signal covering the entire left amygdala or mean or median ICC values  
 660 computed over the entire left amygdala (Table 5 vs statistics reported in 4.2.1.1 and  
 661 Table 6), with some clusters achieving an excellent level of reliability (ICC>.7, see  
 662 Table 5) for standard and TBV-like preprocessing both for the trained and untrained  
 663 signals, which did not occur for the region as a whole.

664

665 **Table 8: Table of mean, standard deviation and median values of ICCs for each**  
 666 **sample, preprocessing, and first level parameter with cluster correction applied.**

| Preprocessing | TBV style | Standard |
|---------------|-----------|----------|
|---------------|-----------|----------|

|                                                    |                             |                             |                             |
|----------------------------------------------------|-----------------------------|-----------------------------|-----------------------------|
| <b>Without training -<br/>Control - Baseline</b>   | <b>Canonical amplitude</b>  | -0.07 ( $\pm 0.21$ ); -0.09 | 0.01 ( $\pm 0.24$ ); 0      |
|                                                    | <b>Amplitude</b>            | 0.29 ( $\pm 0.2$ ); 0.3     | 0.26 ( $\pm 0.22$ ); 0.27   |
|                                                    | <b>Area under the curve</b> | 0.02( $\pm 0.21$ ); 0.01    | 0.21 ( $\pm 0.23$ ); 0.18   |
|                                                    | <b>Onset-delay</b>          | -0.03 ( $\pm 0.23$ ); -0.05 | -0.11 ( $\pm 0.20$ ); -0.14 |
|                                                    | <b>Rise-decay</b>           | NA ( $\pm NA$ ); NA         | NA ( $\pm NA$ ); NA         |
|                                                    | <b>Height</b>               | 0.36 ( $\pm 0.23$ ); 0.33   | 0.17 ( $\pm 0.38$ ); 0.24   |
| <b>With training -<br/>Experimental - Transfer</b> | <b>Canonical amplitude</b>  | -0.11 ( $\pm 0.21$ ); -0.12 | 0.08 ( $\pm 0.21$ ); 0.09   |
|                                                    | <b>Amplitude</b>            | 0.3 ( $\pm 0.18$ ); 0.31    | 0.26 ( $\pm 0.21$ ); 0.25   |
|                                                    | <b>Area under the curve</b> | 0.06 ( $\pm 0.20$ ); 0.07   | 0.13 ( $\pm 0.18$ ); 0.13   |
|                                                    | <b>Onset-delay</b>          | 0.02 ( $\pm 0.24$ ); -0.02  | -0.05 ( $\pm 0.24$ ); -0.13 |
|                                                    | <b>Rise-decay</b>           | NA ( $\pm NA$ ); NA         | NA ( $\pm NA$ ); NA         |
|                                                    | <b>Height</b>               | 0.52 ( $\pm 0.19$ ); 0.56   | 0.35 ( $\pm 0.28$ ); 0.34   |

667 Mean ( $\pm$ standard deviation); median

668

### 669 **4.2.3. Clinical and Design Related Measures**

#### 670 **4.2.3.1. Amygdala signal**

671 Adding covariates when computing semi-partial correlations over the mean  
 672 amygdala signal improved descriptively reliability estimates for the signal without  
 673 training (from  $sr=0.11$  to  $sr=0.14$ ) as well as parameters tested to fit the signal with  
 674 training (mean: from  $sr=0.06$  to  $sr=0.12$ , onset-delay: from  $sr=0.14$  to  $sr=0.21$ , rise-  
 675 decay: from  $sr=0.03$  to  $sr=0.14$ , height: from  $sr=0.16$  to  $sr=0.29$ ) although in no case  
 676 we did achieve a fair level of reliability ( $sr < 0.4$ ).

#### 677 **4.2.3.2. Voxelwise signal**

678 The addition of covariates in never resulted in higher average ranks of  
 679 semipartial correlation distributions on the untrained or trained signal preprocessed  
 680 with the TBV-like or standard pipeline (Figure S1).

681

682

## 5. GENERAL DISCUSSION

683

684

685

686

687

688

689

690

691

692

693

694

695

696

697

698

699

700

701

702

703

704

705

706

707

708

709

710

711

712

713

714

As stated in a recent meta-analysis (Elliott et al., 2020), task fMRI reliability is not systematically evaluated and when it is, task-related fMRI measures show poor reliability. Our literature review shows that both prognostic and interventional fMRI studies in MDD, which might otherwise be poised for clinical translation, also do not attend to reliability. We demonstrate that by attending to some fairly simple principles, we can achieve fair to good reliability in a clinical prediction outcome dataset and excellent reliability in a neurofeedback fMRI study dataset (Figure 1). These principles include careful modeling of the BOLD signal, identification of reliable voxels within regions of interest, and calculation of reliability in the population for which translational applications are being considered. Across both datasets, the height parameter from a gamma variate function was the most reliable way to model the BOLD signal, especially among patients with MDD, in some regions of interest, and was, in some combinations of region and population or training condition, more reliable than canonical amplitude, though in other cases the reverse was true (Table 3 and 5 and Figure S1). Consequently, we recommend that researchers explore multiple ways of modeling the BOLD signal, particularly including gamma variate modeling in MDD, before concluding their experiment has low reliability. It may also be helpful for software for real-time analysis of fMRI data to implement alternative, potentially more reliable ways of characterizing BOLD responses in real-time.

Increasingly, functional differentiation of sub-regions of subcortical structures such as the amygdala has been acknowledged as important for fMRI (Balderston, Schultz, Hopkins, & Helmstetter, 2014; Ball et al., 2007; Michely, Rigoli, Rutledge, Hauser, & Dolan, 2020; Roy et al., 2009). The comparison of test-retest reliability estimates obtained on the feedback signal averaged over the whole amygdala versus these same estimates computed voxelwise in the neurofeedback dataset suggest non-uniformity across the amygdala in signal reliability as well; the extent to which these differences explain previous results localizing function to subregions is unclear. Thus, we suggest it may be useful to use a voxel-wise or subregion approach to estimating test-retest reliability. Indeed, this method reveals significantly large clusters of voxels with excellent test-retest reliability in the left amygdala which could be used as masks for neurofeedback targets; our method is easily feasible for new studies. Such excellent reliability, which is a prerequisite for clinical translation, was not attained in

715 our dataset, using the more common computation of median ICCs for each ROI (e.g.,  
716 as recommended by Caceres et al., 2009) (see Tables 4 and 6).

717 Contrary to our hypotheses, we did not find that adding covariates to the model,  
718 including the scanner on which participants were run and severity, which did change  
719 as a function of intervention, improved test-retest reliability in these datasets (Figure  
720 S1) in ROI-based or whole-brain analyses (see Figure S2). That said, covariates may  
721 still be useful to include in other datasets – we recommend exploring this option further  
722 before dismissing their utility.

723 Reliability did vary by whether the entire sample or only patient's data were  
724 included and by whether or not participants were trained on the task, supporting the  
725 potential utility of quantifying reliability on tasks and populations that are relevant for  
726 the clinical application intended (Tables 3 and 5 and Figure S1).

727 There are several limitations of this review and analyses. As we have focused  
728 only on MDD, it is unclear whether our conclusions apply transdiagnostically.  
729 Improving reliability may require different strategies in other diseases, such as  
730 Parkinsons, due to age-related atrophy, increased movement, and differences in  
731 neurovascular coupling (Lecrux et al., 2019; Paek et al., 2019). There are many fMRI-  
732 based metrics we could have examined, including functional connectivity, volumetric  
733 measures, and resting state designs, which all provoke unique considerations for  
734 optimizing test-retest reliability, some of which have been explored elsewhere (e.g.,  
735 Noble et al., 2019). Here, we focused on regional BOLD activity as it is a common  
736 feature of prediction and neurofeedback studies. Our published data sets had relatively  
737 small number of subjects. This is typical for most clinical fMRI studies, but does raise  
738 the concern that the sample is too small and underpowered. Therefore, we strongly  
739 encourage the replication of these results and that is also why we have applied these  
740 suggestions to two different data sets.

741

742

## 6. CONCLUSIONS

743 To summarize, demonstrating that mechanistic indices are reliable is important  
744 before their clinical adoption in prediction or treatment-development. The literature in  
745 these areas has implicitly accepted this assumption without testing it. Other non-clinical  
746 fMRI studies have shown many of the regions targeted in clinical fMRI studies have  
747 fairly low test-retest reliability, which was largely replicated using the most common  
748 analytic techniques in our datasets. Yet, we have suggested a few principles that

749 appear to improve the test-retest reliability of the obtained mechanistic signals, have  
750 shown their feasibility in two previously published fMRI data sets, and have made code  
751 publicly available so that researchers with minimal mathematical and programming  
752 knowledge can implement them. Wider adoption of these methods could help to realize  
753 the potential of clinical fMRI and could extend to improving psychometrics for other  
754 time-varying mechanistic indices.

755

756

### **Acknowledgements**

757 This work was supported by the National Institutes of Health/ National Institute of  
758 Mental Health [grant numbers MH115927, MH106591, MH074807, MH58356,  
759 MH69618] and through the Pittsburgh Foundation Emmerling Fund [grant number  
760 M2007-0114]. The content is solely the responsibility of the authors and does not  
761 necessarily represent the official views of the funding agencies.

762

763

### **Summary declaration of interest**

764

Declarations of interest: none.

765

766



767  
768  
769  
770  
771  
772  
773  
774  
775  
776  
777  
778  
779  
780  
781  
782  
783  
784  
785  
786  
787  
788  
789  
790  
791  
792  
793  
794  
795  
796  
797  
798  
799  
800

## REFERENCES

- Aguirre, G.K., Zarahn, E., D'esposito, M., 1998. The variability of human, BOLD hemodynamic responses. *Neuroimage*. <https://doi.org/10.1006/nimg.1998.0369>
- Anand, A., Li, Y., Wang, Y., Gardner, K., Lowe, M.J., 2007. Reciprocal Effects of Antidepressant Treatment on Activity and Connectivity of the Mood Regulating Circuit: An fMRI Study. *J. Neuropsychiatry Clin. Neurosci.* <https://doi.org/10.1176/jnp.2007.19.3.274>
- Andersson, J.L.R., Hutton, C., Ashburner, J., Turner, R., Friston, K., 2001. Modeling geometric deformations in EPI time series. *Neuroimage*. <https://doi.org/10.1006/nimg.2001.0746>
- Arnone, D., 2019. Functional MRI findings, pharmacological treatment in major depression and clinical response. *Prog. Neuro-Psychopharmacology Biol. Psychiatry*. <https://doi.org/10.1016/j.pnpbp.2018.08.004>
- Arnone, D., McKie, S., Elliott, R., Thomas, E.J., Downey, D., Juhasz, G., Williams, S.R., Deakin, J.F.W., Anderson, I.M., 2012. Increased amygdala responses to sad but not fearful faces in major depression: Relation to mood state and pharmacological treatment. *Am. J. Psychiatry*. <https://doi.org/10.1176/appi.ajp.2012.11121774>
- Atri, A., O'Brien, J.L., Sreenivasan, A., Rastegar, S., Salisbury, S., DeLuca, A.N., O'Keefe, K.M., LaViolette, P.S., Rentz, D.M., Locascio, J.J., Sperling, R.A., 2011. Test-retest reliability of memory task functional magnetic resonance imaging in alzheimer disease clinical trials. *Arch. Neurol.* <https://doi.org/10.1001/archneurol.2011.94>
- Balderston, N.L., Schultz, D.H., Hopkins, L., Helmstetter, F.J., 2014. Functionally distinct amygdala subregions identified using DTI and high-resolution fMRI. *Soc. Cogn. Affect. Neurosci.* 10, 1615–1622. <https://doi.org/10.1093/scan/nsv055>
- Ball, T., Rahm, B., Eickhoff, S.B., Schulze-Bonhage, A., Speck, O., Mutschler, I., 2007. Response Properties of Human Amygdala Subregions: Evidence Based on Functional MRI Combined with Probabilistic Anatomical Maps. *PLoS One* 2, e307. <https://doi.org/10.1371/journal.pone.0000307>
- Barch, D.M., Mathalon, D.H., 2011. Using brain imaging measures in studies of procognitive pharmacologic agents in schizophrenia: Psychometric and quality assurance considerations. *Biol. Psychiatry*.

- 801 <https://doi.org/10.1016/j.biopsych.2011.01.004>
- 802 Bartko, J.J., 1976. On various intraclass correlation reliability coefficients. *Psychol.*  
803 *Bull.* <https://doi.org/10.1037/0033-2909.83.5.762>
- 804 Bartko, J.J., 1966. The Intraclass Correlation Coefficient as a Measure of Reliability.  
805 *Psychol. Rep.* <https://doi.org/10.2466/pr0.1966.19.1.3>
- 806 Beck, A., Steer, R., Brown, G., 1996. Beck Depression Inventory II manual (2nd ed.  
807 Ed.), ... for Beck Depression Inventory-II.
- 808 Benedetti, F., Radaelli, D., Bernasconi, A., Dallaspezia, S., Colombo, C., Smeraldi,  
809 E., 2009. Changes in medial prefrontal cortex neural responses parallel  
810 successful antidepressant combination of venlafaxine and light therapy. *Arch.*  
811 *Ital. Biol.*
- 812 Bennett, C.M., Miller, M.B., 2013. fMRI reliability: Influences of task and  
813 experimental design. *Cogn. Affect. Behav. Neurosci.*  
814 <https://doi.org/10.3758/s13415-013-0195-1>
- 815 Bennett, C.M., Miller, M.B., 2010. How reliable are the results from functional  
816 magnetic resonance imaging? *Ann. N. Y. Acad. Sci.*  
817 <https://doi.org/10.1111/j.1749-6632.2010.05446.x>
- 818 Brabec, J., Rulseh, A., Hoyt, B., Vizek, M., Horinek, D., Hort, J., Petrovicky, P., 2010.  
819 Volumetry of the human amygdala - An anatomical study. *Psychiatry Res. -*  
820 *Neuroimaging.* <https://doi.org/10.1016/j.psychres.2009.11.005>
- 821 Braver, T.S., Cole, M.W., Yarkoni, T., 2010. Vive les differences! Individual variation  
822 in neural mechanisms of executive control. *Curr. Opin. Neurobiol.*  
823 <https://doi.org/10.1016/j.conb.2010.03.002>
- 824 Caceres, A., Hall, D.L., Zelaya, F.O., Williams, S.C.R., Mehta, M.A., 2009. Measuring  
825 fMRI reliability with the intra-class correlation coefficient. *Neuroimage.*  
826 <https://doi.org/10.1016/j.neuroimage.2008.12.035>
- 827 Calder, A.J., Ewbank, M., Passamonti, L., 2011. Personality influences the neural  
828 responses to viewing facial expressions of emotion. *Philos. Trans. R. Soc. B*  
829 *Biol. Sci.* <https://doi.org/10.1098/rstb.2010.0362>
- 830 Canli, T., Cooney, R.E., Goldin, P., Shah, M., Sivers, H., Thomason, M.E., Whitfield-  
831 Gabrieli, S., Gabriels, J.D.E., Gotlib, I.H., 2005. Amygdala reactivity to emotional  
832 faces predicts improvement in major depression. *Neuroreport.*  
833 <https://doi.org/10.1097/01.wnr.0000174407.09515.cc>
- 834 Chen, C.H., Ridler, K., Suckling, J., Williams, S., Fu, C.H.Y., Merlo-Pich, E.,

- 835 Bullmore, E., 2007. Brain Imaging Correlates of Depressive Symptom Severity  
836 and Predictors of Symptom Improvement After Antidepressant Treatment. *Biol.*  
837 *Psychiatry*. <https://doi.org/10.1016/j.biopsych.2006.09.018>
- 838 Cicchetti, D. V., 1994. Guidelines, Criteria, and Rules of Thumb for Evaluating  
839 Normed and Standardized Assessment Instruments in Psychology. *Psychol.*  
840 *Assess*. <https://doi.org/10.1037/1040-3590.6.4.284>
- 841 Costafreda, S.G., Khanna, A., Mourao-Miranda, J., Fu, C.H.Y., 2009. Neural  
842 correlates of sad faces predict clinical remission to cognitive behavioural therapy  
843 in depression. *Neuroreport*. <https://doi.org/10.1097/WNR.0b013e3283294159>
- 844 Cox, R.W., 1996. AFNI: Software for analysis and visualization of functional magnetic  
845 resonance neuroimages. *Comput. Biomed. Res*.  
846 <https://doi.org/10.1006/cbmr.1996.0014>
- 847 Cullen, K.R., Klimes-Dougan, B., Vu, D.P., Westlund Schreiner, M., Mueller, B.A.,  
848 Eberly, L.E., Camchong, J., Westervelt, A., Lim, K.O., 2016. Neural Correlates of  
849 Antidepressant Treatment Response in Adolescents with Major Depressive  
850 Disorder. *J. Child Adolesc. Psychopharmacol*.  
851 <https://doi.org/10.1089/cap.2015.0232>
- 852 Davidson, R.J., Irwin, W., Anderle, M.J., Kalin, N.H., 2003. The neural substrates of  
853 affective processing in depressed patients treated with venlafaxine. *Am. J.*  
854 *Psychiatry*. <https://doi.org/10.1176/appi.ajp.160.1.64>
- 855 Decharms, R.C., 2008. Applications of real-time fMRI. *Nat. Rev. Neurosci*.  
856 <https://doi.org/10.1038/nrn2414>
- 857 Delaveau, P., Jabourian, M., Lemogne, C., Allaïli, N., Choucha, W., Girault, N.,  
858 Lehericy, S., Laredo, J., Fossati, P., 2016. Antidepressant short-term and long-  
859 term brain effects during self-referential processing in major depression.  
860 *Psychiatry Res. - Neuroimaging*.  
861 <https://doi.org/10.1016/j.psychres.2015.11.007>
- 862 Dichter, G.S., Felder, J.N., Smoski, M.J., 2010. The effects of Brief Behavioral  
863 Activation Therapy for Depression on cognitive control in affective contexts: An  
864 fMRI investigation. *J. Affect. Disord*. <https://doi.org/10.1016/j.jad.2010.03.022>
- 865 Doerig, N., Krieger, T., Altenstein, D., Schlumpf, Y., Spinelli, S., Späti, J., Brakowski,  
866 J., Quednow, B.B., Seifritz, E., Holtforth, M.G., 2016. Amygdala response to self-  
867 critical stimuli and symptom improvement in psychotherapy for depression. *Br. J.*  
868 *Psychiatry*. <https://doi.org/10.1192/bjp.bp.114.149971>

- 869 Elliott, M., Knodt, A., Ireland, D., Morris, M., Poulton, R., Ramrakha, S., Sison, M.,  
870 Moffitt, T., Caspi, A., Hariri, A., 2020. What is the Test-Retest Reliability of  
871 Common Task-fMRI Measures? New Empirical Evidence and a Meta-Analysis.  
872 *Biol. Psychiatry*. <https://doi.org/10.1016/j.biopsych.2020.02.356>
- 873 Fales, C.L., Barch, D.M., Rundle, M.M., Mintun, M.A., Mathews, J., Snyder, A.Z.,  
874 Sheline, Y.I., 2009. Antidepressant treatment normalizes hypoactivity in  
875 dorsolateral prefrontal cortex during emotional interference processing in major  
876 depression. *J. Affect. Disord.* <https://doi.org/10.1016/j.jad.2008.04.027>
- 877 Fang, J., Egorova, N., Rong, P., Liu, J., Hong, Y., Fan, Y., Wang, X., Wang, H., Yu,  
878 Y., Ma, Y., Xu, C., Li, S., Zhao, J., Luo, M., Zhu, B., Kong, J., 2017. Early cortical  
879 biomarkers of longitudinal transcutaneous vagus nerve stimulation treatment  
880 success in depression. *NeuroImage Clin.*  
881 <https://doi.org/10.1016/j.nicl.2016.12.016>
- 882 Fitzgerald, P.B., Sritharan, A., Daskalakis, Z.J., De Castella, A.R., Kulkarni, J., Egan,  
883 G., 2007. A functional magnetic resonance imaging study of the effects of low  
884 frequency right prefrontal transcranial magnetic stimulation in depression. *J.*  
885 *Clin. Psychopharmacol.* <https://doi.org/10.1097/jcp.0b013e318151521c>
- 886 Fonseka, T.M., MacQueen, G.M., Kennedy, S.H., 2018. Neuroimaging biomarkers as  
887 predictors of treatment outcome in Major Depressive Disorder. *J. Affect. Disord.*  
888 <https://doi.org/10.1016/j.jad.2017.10.049>
- 889 Forbes, E.E., Olino, T.M., Ryan, N.D., Birmaher, B., Axelson, D., Moyles, D.L., Dahl,  
890 R.E., 2010. Reward-related brain function as a predictor of treatment response  
891 in adolescents with major depressive disorder. *Cogn. Affect. Behav. Neurosci.*  
892 <https://doi.org/10.3758/CABN.10.1.107>
- 893 Fournier, J.C., Chase, H.W., Almeida, J., Phillips, M.L., 2014. Model specification  
894 and the reliability of fMRI results: Implications for longitudinal neuroimaging  
895 studies in psychiatry. *PLoS One*. <https://doi.org/10.1371/journal.pone.0105169>
- 896 Fovet, T., Jardri, R., Linden, D., 2015. Current Issues in the Use of fMRI-Based  
897 Neurofeedback to Relieve Psychiatric Symptoms. *Curr. Pharm. Des.*  
898 <https://doi.org/10.2174/1381612821666150619092540>
- 899 Frodl, T., Scheuerecker, J., Schoepf, V., Linn, J., Koutsouleris, N., Bokde, A.L.W.,  
900 Hampel, H., Möller, H.J., Brückmann, H., Wiesmann, M., Meisenzahl, E., 2011.  
901 Different effects of mirtazapine and venlafaxine on brain activation: An open  
902 randomized controlled fMRI study. *J. Clin. Psychiatry*.

- 903 <https://doi.org/10.4088/JCP.09m05393blu>
- 904 Fu, C.H.Y., Costafreda, S.G., Sankar, A., Adams, T.M., Rasenick, M.M., Liu, P.,  
905 Donati, R., Maglanoc, L.A., Horton, P., Marangell, L.B., 2015. Multimodal  
906 functional and structural neuroimaging investigation of major depressive disorder  
907 following treatment with duloxetine. *BMC Psychiatry*.  
908 <https://doi.org/10.1186/s12888-015-0457-2>
- 909 Fu, C.H.Y., Steiner, H., Costafreda, S.G., 2013. Predictive neural biomarkers of  
910 clinical response in depression: A meta-analysis of functional and structural  
911 neuroimaging studies of pharmacological and psychological therapies.  
912 *Neurobiol. Dis.* <https://doi.org/10.1016/j.nbd.2012.05.008>
- 913 Fu, C.H.Y., Williams, S.C.R., Brammer, M.J., Suckling, J., Kim, J., Cleare, A.J.,  
914 Walsh, N.D., Mitterschiffthaler, M.T., Andrew, C.M., Pich, E.M., Bullmore, E.T.,  
915 2007. Neural responses to happy facial expressions in major depression  
916 following antidepressant treatment. *Am. J. Psychiatry*.  
917 <https://doi.org/10.1176/ajp.2007.164.4.599>
- 918 Fu, C.H.Y., Williams, S.C.R., Cleare, A.J., Brammer, M.J., Walsh, N.D., Kim, J.,  
919 Andrew, C.M., Pich, E.M., Williams, P.M., Reed, L.J., Mitterschiffthaler, M.T.,  
920 Suckling, J., Bullmore, E.T., 2004. Attenuation of the neural response to sad  
921 faces in major depression by antidepressant treatment: A prospective, event-  
922 related functional magnetic resonance imaging study. *Arch. Gen. Psychiatry*.  
923 <https://doi.org/10.1001/archpsyc.61.9.877>
- 924 Fu, C.H.Y., Williams, S.C.R., Cleare, A.J., Scott, J., Mitterschiffthaler, M.T., Walsh,  
925 N.D., Donaldson, C., Suckling, J., Andrew, C., Steiner, H., Murray, R.M., 2008.  
926 Neural Responses to Sad Facial Expressions in Major Depression Following  
927 Cognitive Behavioral Therapy. *Biol. Psychiatry*.  
928 <https://doi.org/10.1016/j.biopsych.2008.04.033>
- 929 Furey, M.L., Drevets, W.C., Hoffman, E.M., Frankel, E., Speer, A.M., Zarate, C.A.,  
930 2013. Potential of pretreatment neural activity in the visual cortex during  
931 emotional processing to predict treatment response to scopolamine in major  
932 depressive disorder. *JAMA Psychiatry*.  
933 <https://doi.org/10.1001/2013.jamapsychiatry.60>
- 934 Furey, M.L., Drevets, W.C., Szczepanik, J., Khanna, A., Nugent, A., Zarate, C.A.,  
935 2015. Pretreatment differences in BOLD response to emotional faces correlate  
936 with Antidepressant response to scopolamine. *Int. J. Neuropsychopharmacol.*

- 937 <https://doi.org/10.1093/ijnp/pyv028>
- 938 Galbaud Du Fort, G., Newman, S.C., Boothroyd, L.J., Bland, R.C., 1999. Treatment  
939 seeking for depression: Role of depressive symptoms and comorbid psychiatric  
940 diagnoses. *J. Affect. Disord.* [https://doi.org/10.1016/S0165-0327\(98\)00052-4](https://doi.org/10.1016/S0165-0327(98)00052-4)
- 941 Godlewska, B.R., Browning, M., Norbury, R., Cowen, P.J., Harmer, C.J., 2016. Early  
942 changes in emotional processing as a marker of clinical response to SSRI  
943 treatment in depression. *Transl. Psychiatry.* <https://doi.org/10.1038/tp.2016.130>
- 944 Godlewska, B.R., Browning, M., Norbury, R., Igoumenou, A., Cowen, P.J., Harmer,  
945 C.J., 2018. Predicting Treatment Response in Depression: The Role of Anterior  
946 Cingulate Cortex. *Int. J. Neuropsychopharmacol.*  
947 <https://doi.org/10.1093/ijnp/pyy069>
- 948 Godlewska, B.R., Norbury, R., Selvaraj, S., Cowen, P.J., Harmer, C.J., 2012. Short-  
949 term SSRI treatment normalises amygdala hyperactivity in depressed patients.  
950 *Psychol. Med.* <https://doi.org/10.1017/S0033291712000591>
- 951 Guo, C.C., Kurth, F., Zhou, J., Mayer, E.A., Eickhoff, S.B., Kramer, J.H., Seeley,  
952 W.W., 2012. One-year test-retest reliability of intrinsic connectivity network fMRI  
953 in older adults. *Neuroimage.* <https://doi.org/10.1016/j.neuroimage.2012.03.027>
- 954 Gyurak, A., Patenaude, B., Korgaonkar, M.S., Grieve, S.M., Williams, L.M., Etkin, A.,  
955 2016. Frontoparietal activation during response inhibition predicts remission to  
956 antidepressants in patients with major depression. *Biol. Psychiatry.*  
957 <https://doi.org/10.1016/j.biopsych.2015.02.037>
- 958 Hamilton, J.P., Glover, G.H., Bagarinao, E., Chang, C., Mackey, S., Sacchet, M.D.,  
959 Gotlib, I.H., 2016. Effects of salience-network-node neurofeedback training on  
960 affective biases in major depressive disorder. *Psychiatry Res. - Neuroimaging.*  
961 <https://doi.org/10.1016/j.psychres.2016.01.016>
- 962 Handwerker, D.A., Gonzalez-Castillo, J., D'Esposito, M., Bandettini, P.A., 2012. The  
963 continuing challenge of understanding and modeling hemodynamic variation in  
964 fMRI. *Neuroimage.* <https://doi.org/10.1016/j.neuroimage.2012.02.015>
- 965 Hansen, N.S., Siegle, G., 2015. Paving the road to the neurocognitive clinic of  
966 tomorrow: Appealing to standards, in: *From Symptom to Synapse: A  
967 Neurocognitive Perspective on Clinical Psychology.*  
968 <https://doi.org/10.4324/9780203507131>
- 969 Harrington, G.S., Tomaszewski Farias, S., Buonocore, M.H., Yonelinas, A.P., 2006.  
970 The intersubject and intrasubject reproducibility of fMRI activation during three

- 971 encoding tasks: Implications for clinical applications. *Neuroradiology*.  
972 <https://doi.org/10.1007/s00234-006-0083-2>
- 973 Heller, A.S., Johnstone, T., Light, S.N., Peterson, M.J., Kolden, G.G., Kalin, N.H.,  
974 Davidson, R.J., 2013. Relationships between changes in sustained fronto-striatal  
975 connectivity and positive affect in major depression resulting from antidepressant  
976 treatment. *Am. J. Psychiatry*. <https://doi.org/10.1176/appi.ajp.2012.12010014>
- 977 Hrybouski, S., Aghamohammadi-Sereshki, A., Madan, C.R., Shafer, A.T., Baron,  
978 C.A., Seres, P., Beaulieu, C., Olsen, F., Malykhin, N. V., 2016. Amygdala  
979 subnuclei response and connectivity during emotional processing. *Neuroimage*.  
980 <https://doi.org/10.1016/j.neuroimage.2016.02.056>
- 981 Hsiao, C.K., Chen, P.C., Kao, W.H., 2011. Bayesian random effects for interrater and  
982 test-retest reliability with nested clinical observations. *J. Clin. Epidemiol*.  
983 <https://doi.org/10.1016/j.jclinepi.2010.10.015>
- 984 Hunter, A.M., Korb, A.S., Cook, I.A., Leuchter, A.F., 2013. Rostral anterior cingulate  
985 activity in major depressive disorder: State or trait marker of responsiveness to  
986 medication? *J. Neuropsychiatry Clin. Neurosci*.  
987 <https://doi.org/10.1176/appi.neuropsych.11110330>
- 988 Janak, P.H., Tye, K.M., 2015. From circuits to behaviour in the amygdala. *Nature*.  
989 <https://doi.org/10.1038/nature14188>
- 990 Johns, M.W., 1991. A new method for measuring daytime sleepiness: The Epworth  
991 sleepiness scale. *Sleep*. <https://doi.org/10.1093/sleep/14.6.540>
- 992 Keedwell, P.A., Drapier, D., Surguladze, S., Giampietro, V., Brammer, M., Phillips,  
993 M., 2010. Subgenual cingulate and visual cortex responses to sad faces predict  
994 clinical outcome during antidepressant treatment for depression. *J. Affect.*  
995 *Disord*. <https://doi.org/10.1016/j.jad.2009.04.031>
- 996 Koenigs, M., Grafman, J., 2009. The functional neuroanatomy of depression: Distinct  
997 roles for ventromedial and dorsolateral prefrontal cortex. *Behav. Brain Res*.  
998 <https://doi.org/10.1016/j.bbr.2009.03.004>
- 999 Krüger, G., Glover, G.H., 2001. Physiological noise in oxygenation-sensitive  
1000 magnetic resonance imaging. *Magn. Reson. Med*.  
1001 <https://doi.org/10.1002/mrm.1240>
- 1002 Laenen, A., Vangeneugden, T., Geys, H., Molenberghs, G., 2006. Generalized  
1003 reliability estimation using repeated measurements. *Br. J. Math. Stat. Psychol*.  
1004 <https://doi.org/10.1348/000711005X66068>

- 1005 Lahey, M.A., Downey, R.G., Saal, F.E., 1983. Intraclass correlations: There's more  
1006 there than meets the eye. *Psychol. Bull.* [https://doi.org/10.1037/0033-](https://doi.org/10.1037/0033-2909.93.3.586)  
1007 [2909.93.3.586](https://doi.org/10.1037/0033-2909.93.3.586)
- 1008 Langenecker, S.A., Kennedy, S.E., Guidotti, L.M., Briceno, E.M., Own, L.S., Hooven,  
1009 T., Young, E.A., Akil, H., Noll, D.C., Zubieta, J.K., 2007. Frontal and Limbic  
1010 Activation During Inhibitory Control Predicts Treatment Response in Major  
1011 Depressive Disorder. *Biol. Psychiatry.*  
1012 <https://doi.org/10.1016/j.biopsych.2007.02.019>
- 1013 Larson, C.L., Schaefer, H.S., Siegle, G.J., Jackson, C.A.B., Anderle, M.J., Davidson,  
1014 R.J., 2006. Fear Is Fast in Phobic Individuals: Amygdala Activation in Response  
1015 to Fear-Relevant Stimuli. *Biol. Psychiatry.*  
1016 <https://doi.org/10.1016/j.biopsych.2006.03.079>
- 1017 Lebow, M.A., Chen, A., 2016. Overshadowed by the amygdala: The bed nucleus of  
1018 the stria terminalis emerges as key to psychiatric disorders. *Mol. Psychiatry.*  
1019 <https://doi.org/10.1038/mp.2016.1>
- 1020 Lecrux, C., Bourourou, M., Hamel, E., 2019. How reliable is cerebral blood flow to  
1021 map changes in neuronal activity? *Auton. Neurosci. Basic Clin.*  
1022 <https://doi.org/10.1016/j.autneu.2019.01.005>
- 1023 LeDoux, J., 2012. Rethinking the Emotional Brain. *Neuron.*  
1024 <https://doi.org/10.1016/j.neuron.2012.02.004>
- 1025 Lemogne, C., Mayberg, H., Bergouignan, L., Volle, E., Delaveau, P., Lehericy, S.,  
1026 Allilaire, J.F., Fossati, P., 2010. Self-referential processing and the prefrontal  
1027 cortex over the course of depression: A pilot study. *J. Affect. Disord.*  
1028 <https://doi.org/10.1016/j.jad.2009.11.003>
- 1029 Light, S.N., Heller, A.S., Johnstone, T., Kolden, G.G., Peterson, M.J., Kalin, N.H.,  
1030 Davidson, R.J., 2011. Reduced right ventrolateral prefrontal cortex activity while  
1031 inhibiting positive affect is associated with improvement in hedonic capacity after  
1032 8 weeks of antidepressant treatment in major depressive disorder. *Biol.*  
1033 *Psychiatry.* <https://doi.org/10.1016/j.biopsych.2011.06.031>
- 1034 Lin, A.L., Monica Way, H.Y., 2014. Functional Magnetic Resonance Imaging, in:  
1035 *Pathobiology of Human Disease: A Dynamic Encyclopedia of Disease*  
1036 *Mechanisms.* <https://doi.org/10.1016/B978-0-12-386456-7.07610-3>
- 1037 Linden, D.E.J., 2014. Neurofeedback and networks of depression. *Dialogues Clin.*  
1038 *Neurosci.*



- 1039 Linden, D.E.J., Habes, I., Johnston, S.J., Linden, S., Tatineni, R., Subramanian, L.,  
1040 Sorger, B., Healy, D., Goebel, R., 2012. Real-time self-regulation of emotion  
1041 networks in patients with depression. PLoS One.  
1042 <https://doi.org/10.1371/journal.pone.0038115>
- 1043 Lindquist, M.A., Meng Loh, J., Atlas, L.Y., Wager, T.D., 2009. Modeling the  
1044 hemodynamic response function in fMRI: efficiency, bias and mis-modeling.  
1045 Neuroimage. <https://doi.org/10.1016/j.neuroimage.2008.10.065>
- 1046 Lois, G., Kirsch, P., Sandner, M., Plichta, M.M., Wessa, M., 2018. Experimental and  
1047 methodological factors affecting test-retest reliability of amygdala BOLD  
1048 responses. Psychophysiology. <https://doi.org/10.1111/psyp.13220>
- 1049 López-Solà, M., Pujol, J., Hernández-Ribas, R., Harrison, B.J., Contreras-Rodríguez,  
1050 O., Soriano-Mas, C., Deus, J., Ortiz, H., Menchón, J.M., Vallejo, J., Cardoner,  
1051 N., 2010. Effects of duloxetine treatment on brain response to painful stimulation  
1052 in major depressive disorder. Neuropsychopharmacology.  
1053 <https://doi.org/10.1038/npp.2010.108>
- 1054 MacDuffie, K.E., MacInnes, J., Dickerson, K.C., Eddington, K.M., Strauman, T.J.,  
1055 Adcock, R.A., 2018. Single session real-time fMRI neurofeedback has a lasting  
1056 impact on cognitive behavioral therapy strategies. NeuroImage Clin.  
1057 <https://doi.org/10.1016/j.nicl.2018.06.009>
- 1058 Mandell, D., Siegle, G.J., Shutt, L., Feldmiller, J., Thase, M.E., 2014. Neural  
1059 substrates of trait ruminations in depression. J. Abnorm. Psychol. 123, 35–48.  
1060 <https://doi.org/10.1037/a0035834>
- 1061 Mehler, D.M.A., Sokunbi, M.O., Habes, I., Barawi, K., Subramanian, L., Range, M.,  
1062 Evans, J., Hood, K., Lührs, M., Keedwell, P., Goebel, R., Linden, D.E.J., 2018.  
1063 Targeting the affective brain—a randomized controlled trial of real-time fMRI  
1064 neurofeedback in patients with depression. Neuropsychopharmacology.  
1065 <https://doi.org/10.1038/s41386-018-0126-5>
- 1066 Michely, J., Rigoli, F., Rutledge, R.B., Hauser, T.U., Dolan, R.J., 2020. Distinct  
1067 Processing of Aversive Experience in Amygdala Subregions. Biol. Psychiatry  
1068 Cogn. Neurosci. Neuroimaging 5, 291–300.  
1069 <https://doi.org/10.1016/j.bpsc.2019.07.008>
- 1070 Miki, A., Raz, J., Van Erp, T.G.M., Liu, C.S.J., Haselgrove, J.C., Liu, G.T., 2000.  
1071 Reproducibility of visual activation in functional MR imaging and effects of  
1072 postprocessing. Am. J. Neuroradiol.

- 1073 Miller, J.M., Schneck, N., Siegle, G.J., Chen, Y., Ogden, R.T., Kikuchi, T., Oquendo,  
1074 M.A., Mann, J.J., Parsey, R. V., 2013. fMRI response to negative words and  
1075 SSRI treatment outcome in major depressive disorder: A preliminary study.  
1076 *Psychiatry Res. - Neuroimaging*.  
1077 <https://doi.org/10.1016/j.pscychresns.2013.08.001>
- 1078 Nichols, T.E., Das, S., Eickhoff, S.B., Evans, A.C., Glatard, T., Hanke, M.,  
1079 Kriegeskorte, N., Milham, M.P., Poldrack, R.A., Poline, J.B., Proal, E., Thirion,  
1080 B., Van Essen, D.C., White, T., Yeo, B.T.T., 2017. Best practices in data  
1081 analysis and sharing in neuroimaging using MRI. *Nat. Neurosci*.  
1082 <https://doi.org/10.1038/nn.4500>
- 1083 Noble, S., Scheinost, D., Constable, R.T., 2019. A decade of test-retest reliability of  
1084 functional connectivity: A systematic review and meta-analysis. *Neuroimage*.  
1085 <https://doi.org/10.1016/j.neuroimage.2019.116157>
- 1086 Nolen-Hoeksema, S., Morrow, J., Fredrickson, B.L., 1993. Response styles and the  
1087 duration of episodes of depressed mood. *J. Abnorm. Psychol.* 102, 20–28.  
1088 <https://doi.org/10.1037/0021-843X.102.1.20>
- 1089 Nord, C.L., Gray, A., Charpentier, C.J., Robinson, O.J., Roiser, J.P., 2017.  
1090 Unreliability of putative fMRI biomarkers during emotional face processing.  
1091 *Neuroimage*. <https://doi.org/10.1016/j.neuroimage.2017.05.024>
- 1092 Oakes, T.R., Johnstone, T., Ores Walsh, K.S., Greischar, L.L., Alexander, A.L., Fox,  
1093 A.S., Davidson, R.J., 2005. Comparison of fMRI motion correction software  
1094 tools. *Neuroimage*. <https://doi.org/10.1016/j.neuroimage.2005.05.058>
- 1095 Opmeer, E.M., Kortekaas, R., Van Tol, M.J., Renken, R.J., Demenescu, L.R.,  
1096 Woudstra, S., Ter Horst, G.J., Van Buchem, M.A., Van Der Wee, N.J.A.,  
1097 Veltman, D.J., Aleman, A., 2016. Changes in regional brain activation related to  
1098 depressive state: A 2-year longitudinal functional MRI study. *Depress. Anxiety*.  
1099 <https://doi.org/10.1002/da.22425>
- 1100 Paek, E.J., Murray, L.L., Newman, S.D., Kim, D.J., 2019. Test-retest reliability in an  
1101 fMRI study of naming in dementia. *Brain Lang*.  
1102 <https://doi.org/10.1016/j.bandl.2019.02.002>
- 1103 Palmer, C.E., Langbehn, D., Tabrizi, S.J., Papoutsis, M., 2018. Test-retest reliability of  
1104 measures commonly used to measure striatal dysfunction across multiple testing  
1105 sessions: A longitudinal study. *Front. Psychol*.  
1106 <https://doi.org/10.3389/fpsyg.2017.02363>

- 1107 Palomero-Gallagher, N., Hoffstaedter, F., Mohlberg, H., Eickhoff, S.B., Amunts, K.,  
1108 Zilles, K., 2019. Human Pregenual Anterior Cingulate Cortex: Structural,  
1109 Functional, and Connectional Heterogeneity. *Cereb. Cortex*.  
1110 <https://doi.org/10.1093/cercor/bhy124>
- 1111 Peng, S.-L., Chen, C.-M., Huang, C.-Y., Shih, C.-T., Huang, C.-W., Chiu, S.-C.,  
1112 Shen, W.-C., 2019. Effects of Hemodynamic Response Function Selection on  
1113 Rat fMRI Statistical Analyses. *Front. Neurosci*.  
1114 <https://doi.org/10.3389/fnins.2019.00400>
- 1115 Phillips, M.L., Swartz, H.A., 2014. A Critical Appraisal of Neuroimaging Studies of  
1116 Bipolar Disorder: Toward a New Conceptualization of Underlying Neural Circuitry  
1117 and a Road Map for Future Research. *Am. J. Psychiatry* 171, 829–843.  
1118 <https://doi.org/10.1176/appi.ajp.2014.13081008>
- 1119 Pickford, R.W., Guilford, J.P., 2007. Psychometric Methods. *Br. J. Sociol*.  
1120 <https://doi.org/10.2307/586971>
- 1121 Plichta, M.M., Schwarz, A.J., Grimm, O., Morgen, K., Mier, D., Haddad, L., Gerdes,  
1122 A.B.M., Sauer, C., Tost, H., Esslinger, C., Colman, P., Wilson, F., Kirsch, P.,  
1123 Meyer-Lindenberg, A., 2012. Test-retest reliability of evoked BOLD signals from  
1124 a cognitive-emotive fMRI test battery. *Neuroimage*.  
1125 <https://doi.org/10.1016/j.neuroimage.2012.01.129>
- 1126 Poldrack, R.A., Baker, C.I., Durnez, J., Gorgolewski, K.J., Matthews, P.M., Munafò,  
1127 M.R., Nichols, T.E., Poline, J.B., Vul, E., Yarkoni, T., 2017. Scanning the  
1128 horizon: Towards transparent and reproducible neuroimaging research. *Nat.*  
1129 *Rev. Neurosci.* <https://doi.org/10.1038/nrn.2016.167>
- 1130 Portney, L., Watkins, M., 2009. *Foundations of Clinical Research: Applications to*  
1131 *Practice*, Upper Saddle River, NJ: Pearson/Prentice Hall.
- 1132 Ritchey, M., Dolcos, F., Eddington, K.M., Strauman, T.J., Cabeza, R., 2011. Neural  
1133 correlates of emotional processing in depression: Changes with cognitive  
1134 behavioral therapy and predictors of treatment response. *J. Psychiatr. Res.*  
1135 <https://doi.org/10.1016/j.jpsychires.2010.09.007>
- 1136 Rizvi, S.J., Salomons, T. V., Konarski, J.Z., Downar, J., Jacobbe, P., McIntyre, R.S.,  
1137 Kennedy, S.H., 2013. Neural response to emotional stimuli associated with  
1138 successful antidepressant treatment and behavioral activation. *J. Affect. Disord.*  
1139 <https://doi.org/10.1016/j.jad.2013.06.050>
- 1140 Robertson, B., Wang, L., Diaz, M.T., Aiello, M., Gersing, K., Beyer, J., Mukundan, S.,

- 1141 McCarthy, G., Doraiswamy, P.M., 2007. Effect of bupropion extended release on  
1142 negative emotion processing in major depressive disorder: A pilot functional  
1143 magnetic resonance imaging study. *J. Clin. Psychiatry*.  
1144 <https://doi.org/10.4088/JCP.v68n0212>
- 1145 Rosenblau, G., Sterzer, P., Stoy, M., Park, S., Friedel, E., Heinz, A., Pilhatsch, M.,  
1146 Bauer, M., Ströhle, A., 2012. Functional neuroanatomy of emotion processing in  
1147 major depressive disorder is altered after successful antidepressant therapy. *J.*  
1148 *Psychopharmacol.* <https://doi.org/10.1177/0269881112450779>
- 1149 Roy, A.K., Shehzad, Z., Margulies, D.S., Kelly, A.M.C., Uddin, L.Q., Gotimer, K.,  
1150 Biswal, B.B., Castellanos, F.X., Milham, M.P., 2009. Functional connectivity of  
1151 the human amygdala using resting state fMRI. *Neuroimage*.  
1152 <https://doi.org/10.1016/j.neuroimage.2008.11.030>
- 1153 Roy, M., Harvey, P.O., Berlim, M.T., Mamdani, F., Beaulieu, M.M., Turecki, G.,  
1154 Lepage, M., 2010. Medial prefrontal cortex activity during memory encoding of  
1155 pictures and its relation to symptomatic improvement after citalopram treatment  
1156 in patients with major depression. *J. Psychiatry Neurosci.*  
1157 <https://doi.org/10.1503/jpn.090010>
- 1158 Rubin-Falcone, H., Weber, J., Kishon, R., Ochsner, K., Delaparte, L., Doré, B.,  
1159 Zanderigo, F., Oquendo, M.A., Mann, J.J., Miller, J.M., 2018. Longitudinal effects  
1160 of cognitive behavioral therapy for depression on the neural correlates of  
1161 emotion regulation. *Psychiatry Res. - Neuroimaging*.  
1162 <https://doi.org/10.1016/j.psychres.2017.11.002>
- 1163 Ruhé, H.G., Booij, J., Veltman, D.J., Michel, M.C., Schene, A.H., 2012. Successful  
1164 pharmacologic treatment of major depressive disorder attenuates amygdala  
1165 activation to negative facial expressions: A functional magnetic resonance  
1166 imaging study. *J. Clin. Psychiatry*. <https://doi.org/10.4088/JCP.10m06584>
- 1167 Ruiz, S., Buyukturkoglu, K., Rana, M., Birbaumer, N., Sitaram, R., 2014. Real-time  
1168 fMRI brain computer interfaces: Self-regulation of single brain regions to  
1169 networks. *Biol. Psychol.* <https://doi.org/10.1016/j.biopsycho.2013.04.010>
- 1170 Samson, A.C., Meisenzahl, E., Scheuerecker, J., Rose, E., Schoepf, V., Wiesmann,  
1171 M., Frodl, T., 2011. Brain activation predicts treatment improvement in patients  
1172 with major depressive disorder. *J. Psychiatr. Res.*  
1173 <https://doi.org/10.1016/j.jpsychires.2011.03.009>
- 1174 Sankar, A., Adams, T.M., Costafreda, S.G., Marangell, L.B., Fu, C.H.Y., 2017.

- 1175 Effects of antidepressant therapy on neural components of verbal working  
1176 memory in depression. *J. Psychopharmacol.*  
1177 <https://doi.org/10.1177/0269881117724594>
- 1178 Schaefer, H.S., Putnam, K.M., Benca, R.M., Davidson, R.J., 2006. Event-Related  
1179 Functional Magnetic Resonance Imaging Measures of Neural Activity to Positive  
1180 Social Stimuli in Pre- and Post-Treatment Depression. *Biol. Psychiatry.*  
1181 <https://doi.org/10.1016/j.biopsych.2006.03.024>
- 1182 Shan, Z.Y., Wright, M.J., Thompson, P.M., McMahon, K.L., Blokland, G.G.A.M., De  
1183 Zubicaray, G.I., Martin, N.G., Vinkhuyzen, A.A.E., Reutens, D.C., 2014.  
1184 Modeling of the hemodynamic responses in block design fMRI studies. *J. Cereb.*  
1185 *Blood Flow Metab.* <https://doi.org/10.1038/jcbfm.2013.200>
- 1186 Sheatsley, P.B., 1983. Questionnaire Construction and Item Writing, in: *Handbook of*  
1187 *Survey Research.* <https://doi.org/10.1016/b978-0-12-598226-9.50012-4>
- 1188 Sheline, Y.I., Barch, D.M., Donnelly, J.M., Ollinger, J.M., Snyder, A.Z., Mintun, M.A.,  
1189 2001. Increased amygdala response to masked emotional faces in depressed  
1190 subjects resolves with antidepressant treatment: An fMRI study. *Biol. Psychiatry.*  
1191 [https://doi.org/10.1016/S0006-3223\(01\)01263-X](https://doi.org/10.1016/S0006-3223(01)01263-X)
- 1192 Shrout, P.E., Fleiss, J.L., 1979. Intraclass correlations: Uses in assessing rater  
1193 reliability. *Psychol. Bull.* <https://doi.org/10.1037/0033-2909.86.2.420>
- 1194 Siegle, G.J., Carter, C.S., Thase, M.E., 2006. Use of fMRI to predict recovery from  
1195 unipolar depression with cognitive behavior therapy. *Am. J. Psychiatry.*  
1196 <https://doi.org/10.1176/ajp.2006.163.4.735>
- 1197 Siegle, G.J., Steinhauer, S.R., Thase, M.E., Stenger, V.A., Carter, C.S., 2002. Can't  
1198 shake that feeling: Event-related fMRI assessment of sustained amygdala  
1199 activity in response to emotional information in depressed individuals. *Biol.*  
1200 *Psychiatry.* <https://doi.org/10.4324/9780203706978>
- 1201 Siegle, G.J., Thompson, W.K., Collier, A., Berman, S.R., Feldmiller, J., Thase, M.E.,  
1202 Friedman, E.S., 2012. Toward Clinically Useful Neuroimaging in Depression  
1203 Treatment. *Arch. Gen. Psychiatry.*  
1204 <https://doi.org/10.1001/archgenpsychiatry.2012.65>
- 1205 Sladky, R., Höflich, A., Atanelov, J., Kraus, C., Baldinger, P., Moser, E.,  
1206 Lanzenberger, R., Windischberger, C., 2012. Increased Neural Habituation in  
1207 the Amygdala and Orbitofrontal Cortex in Social Anxiety Disorder Revealed by  
1208 fMRI. *PLoS One.* <https://doi.org/10.1371/journal.pone.0050050>

- 1209 Spielberger, C., 1983. Manual for the State-Trait Anxiety Inventory (STAI). Consult.  
1210 Psychol. Press 4–26. [https://doi.org/10.1007/978-0-387-78665-0\\_6709](https://doi.org/10.1007/978-0-387-78665-0_6709)
- 1211 Spies, M., Kraus, C., Geissberger, N., Auer, B., Klöbl, M., Tik, M., Störkat, I.L., Hahn,  
1212 A., Woletz, M., Pfabigan, D.M., Kasper, S., Lamm, C., Windischberger, C.,  
1213 Lanzenberger, R., 2017. Default mode network deactivation during emotion  
1214 processing predicts early antidepressant response. *Transl. Psychiatry*.  
1215 <https://doi.org/10.1038/tp.2016.265>
- 1216 Stoy, M., Schlagenhaut, F., Sterzer, P., BERPohl, F., Hägele, C., Suchotzki, K.,  
1217 Schmack, K., Wrase, J., Ricken, R., Knutson, B., Adli, M., Bauer, M., Heinz, A.,  
1218 Ströhle, A., 2012. Hyporeactivity of ventral striatum towards incentive stimuli in  
1219 unmedicated depressed patients normalizes after treatment with escitalopram. *J.*  
1220 *Psychopharmacol.* <https://doi.org/10.1177/02698811111416686>
- 1221 Straub, J., Plener, P.L., Sproeber, N., Sprenger, L., Koelch, M.G., Groen, G., Abler,  
1222 B., 2015. Neural correlates of successful psychotherapy of depression in  
1223 adolescents. *J. Affect. Disord.* <https://doi.org/10.1016/j.jad.2015.05.020>
- 1224 Strege, M. V, Siegle, G.J., Young, K., 2020. Cingulate prediction of response to  
1225 antidepressant and cognitive behavioral therapies for depression: Theory, meta-  
1226 analysis, and empirical application. *bioRxiv* 2020.12.02.407841.  
1227 <https://doi.org/10.1101/2020.12.02.407841>
- 1228 Szczepanik, J., Nugent, A.C., Drevets, W.C., Khanna, A., Zarate, C.A., Furey, M.L.,  
1229 2016. Amygdala response to explicit sad face stimuli at baseline predicts  
1230 antidepressant treatment response to scopolamine in major depressive disorder.  
1231 *Psychiatry Res. - Neuroimaging*.  
1232 <https://doi.org/10.1016/j.pscychresns.2016.06.005>
- 1233 Tao, R., Calley, C.S., Hart, J., Mayes, T.L., Nakonezny, P.A., Lu, H., Kennard, B.D.,  
1234 Tamminga, C.A., Emslie, G.J., 2012. Brain activity in adolescent major  
1235 depressive disorder before and after fluoxetine treatment. *Am. J. Psychiatry*.  
1236 <https://doi.org/10.1176/appi.ajp.2011.11040615>
- 1237 Taylor, S.F., Ho, S.S., Abagis, T., Angstadt, M., Maixner, D.F., Welsh, R.C.,  
1238 Hernandez-Garcia, L., 2018. Changes in brain connectivity during a sham-  
1239 controlled, transcranial magnetic stimulation trial for depression. *J. Affect.*  
1240 *Disord.* <https://doi.org/10.1016/j.jad.2018.02.019>
- 1241 Thibault, R.T., MacPherson, A., Lifshitz, M., Roth, R.R., Raz, A., 2018.  
1242 Neurofeedback with fMRI: A critical systematic review. *Neuroimage*.

- 1243 <https://doi.org/10.1016/j.neuroimage.2017.12.071>
- 1244 Toki, S., Okamoto, Y., Onoda, K., Matsumoto, T., Yoshimura, S., Kunisato, Y.,  
1245 Okada, G., Shishida, K., Kobayakawa, M., Fukumoto, T., Machino, A., Inagaki,  
1246 M., Yamawaki, S., 2014. Hippocampal activation during associative encoding of  
1247 word pairs and its relation to symptomatic improvement in depression: A  
1248 functional and volumetric MRI study. *J. Affect. Disord.*  
1249 <https://doi.org/10.1016/j.jad.2013.07.021>
- 1250 Victor, T.A., Furey, M.L., Fromm, S.J., Öhman, A., Drevets, W.C., 2013. Changes in  
1251 the neural correlates of implicit emotional face processing during antidepressant  
1252 treatment in major depressive disorder, in: *International Journal of*  
1253 *Neuropsychopharmacology*. <https://doi.org/10.1017/S146114571300062X>
- 1254 Victor, T.A., Furey, M.L., Fromm, S.J., Öhman, A., Drevets, W.C., 2010. Relationship  
1255 between amygdala responses to masked faces and mood state and treatment in  
1256 major depressive disorder. *Arch. Gen. Psychiatry*.  
1257 <https://doi.org/10.1001/archgenpsychiatry.2010.144>
- 1258 Vul, E., Harris, C., Winkielman, P., Pashler, H., 2009. Puzzlingly High Correlations in  
1259 fMRI Studies of Emotion, Personality, and Social Cognition (a.k.a. Voodoo  
1260 Correlations in Social Neuroscience). *Perspect. Psychol. Sci.*
- 1261 Wagner, G., Koch, K., Schachtzabel, C., Sobanski, T., Reichenbach, J.R., Sauer, H.,  
1262 Schlösser, R.G.M., 2010. Differential effects of serotonergic and noradrenergic  
1263 antidepressants on brain activity during a cognitive control task and  
1264 neurofunctional prediction of treatment outcome in patients with depression. *J.*  
1265 *Psychiatry Neurosci*. <https://doi.org/10.1503/jpn.090081>
- 1266 Walsh, N.D., Williams, S.C.R., Brammer, M.J., Bullmore, E.T., Kim, J., Suckling, J.,  
1267 Mitterschiffthaler, M.T., Cleare, A.J., Pich, E.M., Mehta, M.A., Fu, C.H.Y., 2007.  
1268 A Longitudinal Functional Magnetic Resonance Imaging Study of Verbal  
1269 Working Memory in Depression After Antidepressant Therapy. *Biol. Psychiatry*.  
1270 <https://doi.org/10.1016/j.biopsych.2006.12.022>
- 1271 Wang, Y., Xu, C., Cao, X., Gao, Q., Li, J., Liu, Z., Sun, N., Ren, Y., Zhang, K., 2012.  
1272 Effects of an antidepressant on neural correlates of emotional processing in  
1273 patients with major depression. *Neurosci. Lett.*  
1274 <https://doi.org/10.1016/j.neulet.2012.08.034>
- 1275 Wessa, M., Lois, G., 2015. Brain Functional Effects of Psychopharmacological  
1276 Treatment in Major Depression: a Focus on Neural Circuitry of Affective

- 1277 Processing. *Curr. Neuropharmacol.*  
1278 <https://doi.org/10.2174/1570159x13666150416224801>
- 1279 Williams, L.M., Korgaonkar, M.S., Song, Y.C., Paton, R., Eagles, S., Goldstein-  
1280 Piekarski, A., Grieve, S.M., Harris, A.W.F., Usherwood, T., Etkin, A., 2015.  
1281 Amygdala Reactivity to Emotional Faces in the Prediction of General and  
1282 Medication-Specific Responses to Antidepressant Treatment in the Randomized  
1283 iSPOT-D Trial. *Neuropsychopharmacology*. <https://doi.org/10.1038/npp.2015.89>
- 1284 Yoshimura, S., Okamoto, Y., Onoda, K., Matsunaga, M., Okada, G., Kunisato, Y.,  
1285 Yoshino, A., Ueda, K., Suzuki, S. ichi, Yamawaki, S., 2014. Cognitive behavioral  
1286 therapy for depression changes medial prefrontal and ventral anterior cingulate  
1287 cortex activity associated with self-referential processing. *Soc. Cogn. Affect.*  
1288 *Neurosci.* <https://doi.org/10.1093/scan/nst009>
- 1289 Young, K.D., Misaki, M., Harmer, C.J., Victor, T., Zotev, V., Phillips, R., Siegle, G.J.,  
1290 Drevets, W.C., Bodurka, J., 2017a. Real-Time fMRI Amygdala Neurofeedback  
1291 Changes Positive Information Processing in Major Depressive Disorder. *Biol.*  
1292 *Psychiatry*. <https://doi.org/10.1016/j.biopsych.2017.03.013>
- 1293 Young, K.D., Siegle, G.J., Misaki, M., Zotev, V., Phillips, R., Drevets, W.C., Bodurka,  
1294 J., 2018. Altered task-based and resting-state amygdala functional connectivity  
1295 following real-time fMRI amygdala neurofeedback training in major depressive  
1296 disorder. *NeuroImage Clin.* <https://doi.org/10.1016/j.nicl.2017.12.004>
- 1297 Young, K.D., Siegle, G.J., Zotev, V., Phillips, R., Misaki, M., Yuan, H., Drevets, W.C.,  
1298 Bodurka, J., 2017b. Randomized clinical trial of real-time fMRI amygdala  
1299 neurofeedback for major depressive disorder: Effect on symptoms and  
1300 autobiographical memory recall, in: *American Journal of Psychiatry*.  
1301 <https://doi.org/10.1176/appi.ajp.2017.16060637>
- 1302 Young, K.D., Zotev, V., Phillips, R., Misaki, M., Yuan, H., Drevets, W.C., Bodurka, J.,  
1303 2014. Real-time fMRI neurofeedback training of amygdala activity in patients  
1304 with major depressive disorder. *PLoS One*.  
1305 <https://doi.org/10.1371/journal.pone.0088785>
- 1306 Yuan, H., Young, K.D., Phillips, R., Zotev, V., Misaki, M., Bodurka, J., 2014. Resting-  
1307 State Functional Connectivity Modulation and Sustained Changes After Real-  
1308 Time Functional Magnetic Resonance Imaging Neurofeedback Training in  
1309 Depression. *Brain Connect.* <https://doi.org/10.1089/brain.2014.0262>
- 1310 Zandbelt, B.B., Gladwin, T.E., Raemaekers, M., van Buuren, M., Neggers, S.F.,



- 1311 Kahn, R.S., Ramsey, N.F., Vink, M., 2008. Within-subject variation in BOLD-  
1312 fMRI signal changes across repeated measurements: Quantification and  
1313 implications for sample size. *Neuroimage*.  
1314 <https://doi.org/10.1016/j.neuroimage.2008.04.183>
- 1315 Zhilkin, P., Alexander, M.E., 2004. Affine registration: A comparison of several  
1316 programs. *Magn. Reson. Imaging*. <https://doi.org/10.1016/j.mri.2003.05.004>
- 1317 Zotev, V., Phillips, R., Yuan, H., Misaki, M., Bodurka, J., 2014. Self-regulation of  
1318 human brain activity using simultaneous real-time fMRI and EEG  
1319 neurofeedback. *Neuroimage*. <https://doi.org/10.1016/j.neuroimage.2013.04.126>
- 1320 Zotev, V., Yuan, H., Misaki, M., Phillips, R., Young, K.D., Feldner, M.T., Bodurka, J.,  
1321 2016. Correlation between amygdala BOLD activity and frontal EEG asymmetry  
1322 during real-time fMRI neurofeedback training in patients with depression.  
1323 *NeuroImage Clin*. <https://doi.org/10.1016/j.nicl.2016.02.003>  
1324
